# Supplementary material for: Synthesis and Cytotoxic Evaluation of Some Substituted 5-Pyrazolones and Their Urea Derivatives
Source: PubMed Central journal article supplement (PMC7070565; doi:10.3390/molecules25040900), 2020-02-18

# SUPPLEMENTARY INFORMATION

## Synthesis and cytotoxic evaluation of some substituted 5-pyrazolones and their urea derivatives

ALIYE GEDIZ ERTURK\* and HILAL OMERUSTAOGU

Department of Chemistry, Faculty of Science & Arts, Ordu University, 52200, Ordu, TURKEY

\*E-mail: aerturk@att.net

### Table of contents

|                                                                                |    |
|--------------------------------------------------------------------------------|----|
| The FT-IR spectra of the synthesized compounds (Figures S1-S9)                 | 2  |
| The <sup>1</sup> H NMR spectra of the synthesized compounds (Figures S10-S18)  | 5  |
| The FT-IR spectra of the synthesized compounds (Figures S1-S9)                 | 2  |
| The <sup>13</sup> C NMR spectra of the synthesized compounds (Figures S19-S27) | 10 |
| The LC-MS/MS spectra of the synthesized compounds (Figures S28-S36)            | 15 |
| The Elemental analysis results of the synthesized compounds (Table S1)         | 20 |
| Time dependent cell viability plots (Figures S37-S45)                          | 21 |
| Time and dose dependent cell viability plots (Figure S46)                      | 23 |

## FT-IR spectra

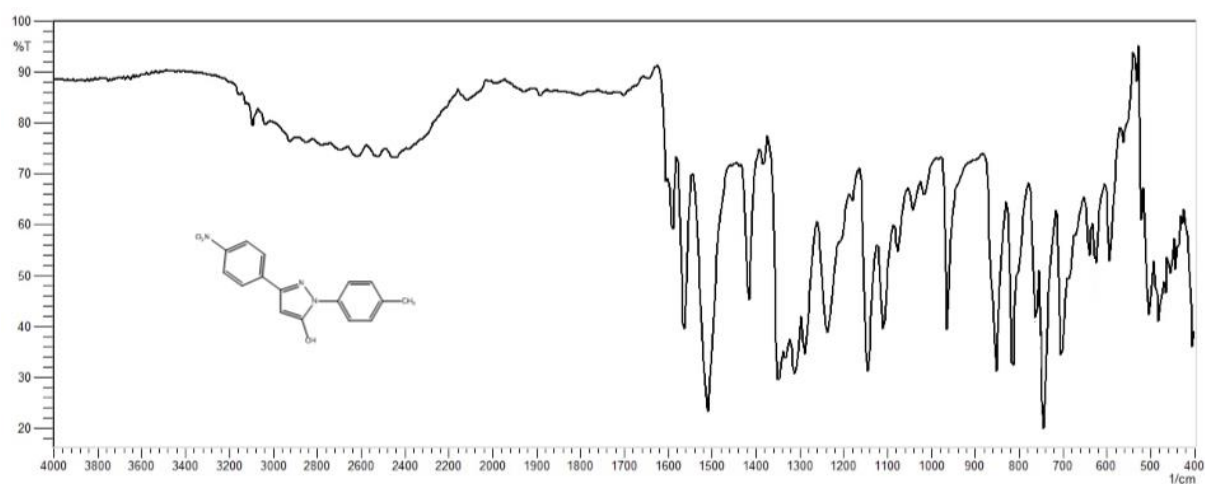

**Figure S1.** FTIR spectrum of 5-hydroxy-3-(4-nitrophenyl)-1-(p-tolyl)-1H-pyrazole **3e**.

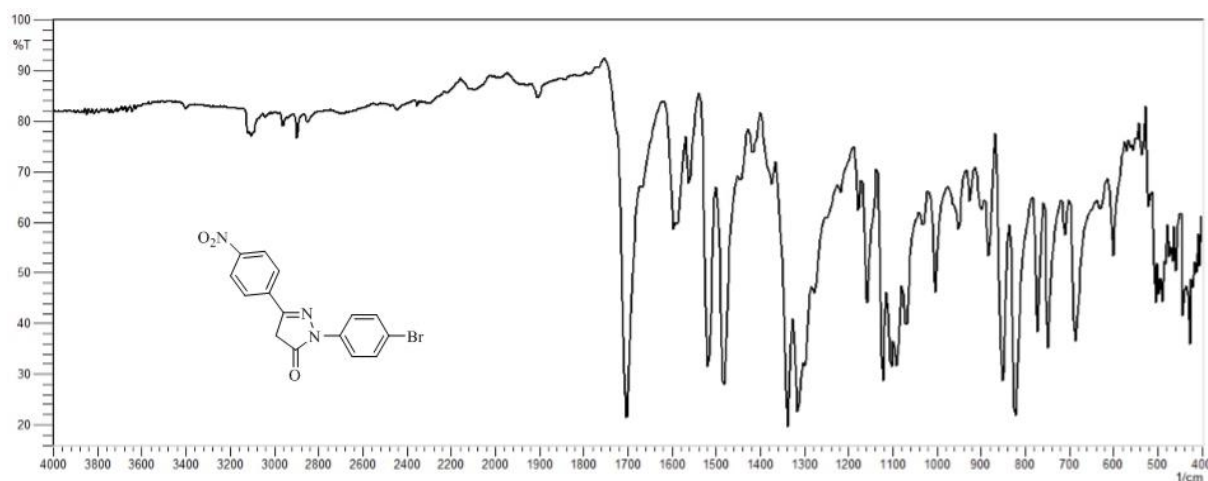

**Figure S2.** FTIR spectrum of 1-(4-bromophenyl)-3-(4-nitrophenyl)-1H-pyrazole-5(4H)-one **3f**.

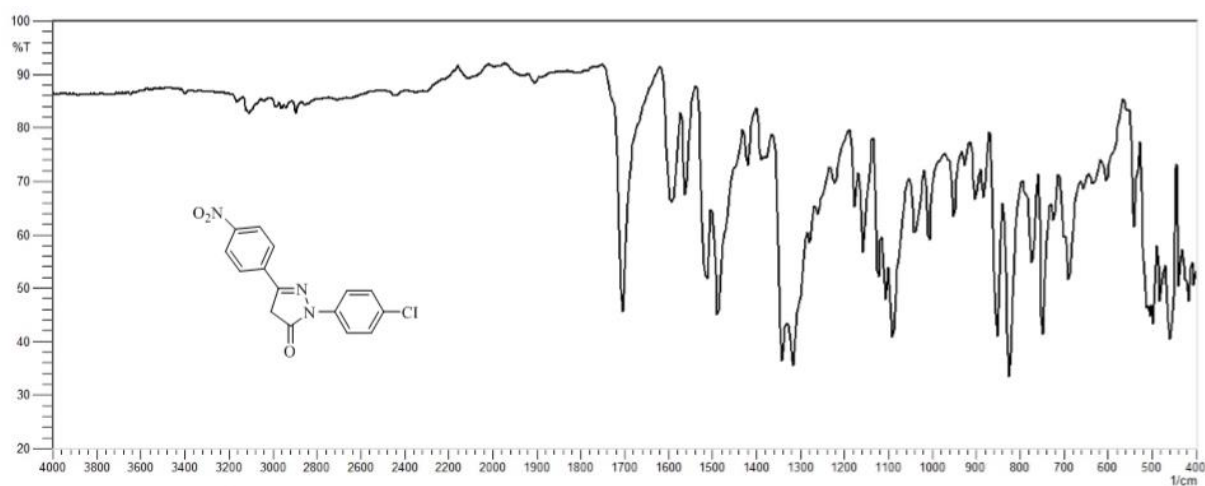

**Figure S3.** FTIR spectrum of 1-(4-chlorophenyl)-3-(4-nitrophenyl)-1H-pyrazole-5(4H)-one **3g**.

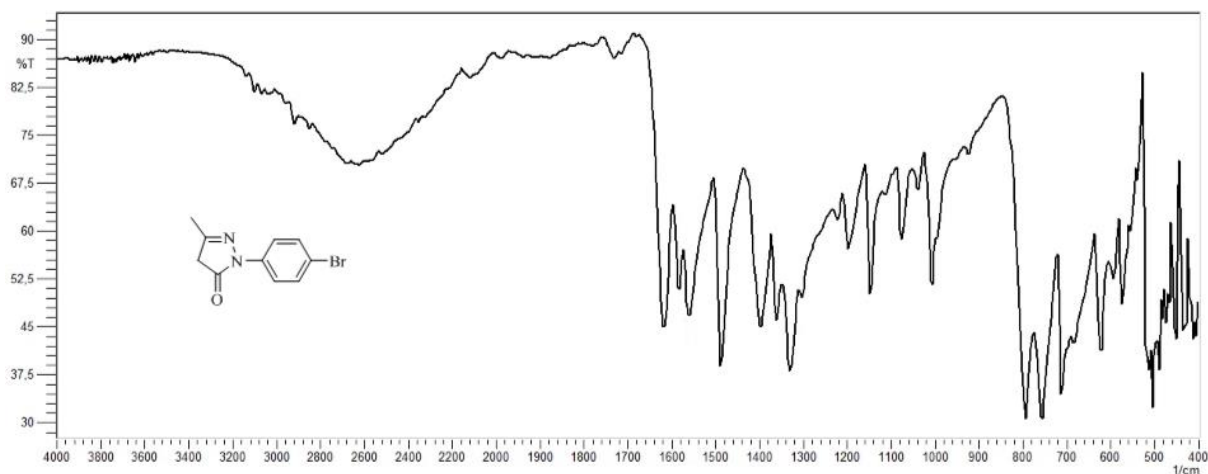

**Figure S4.** FTIR spectrum of 1-(4-bromophenyl)-3-methyl-1*H*-pyrazole-5(4*H*)-one **3h**.

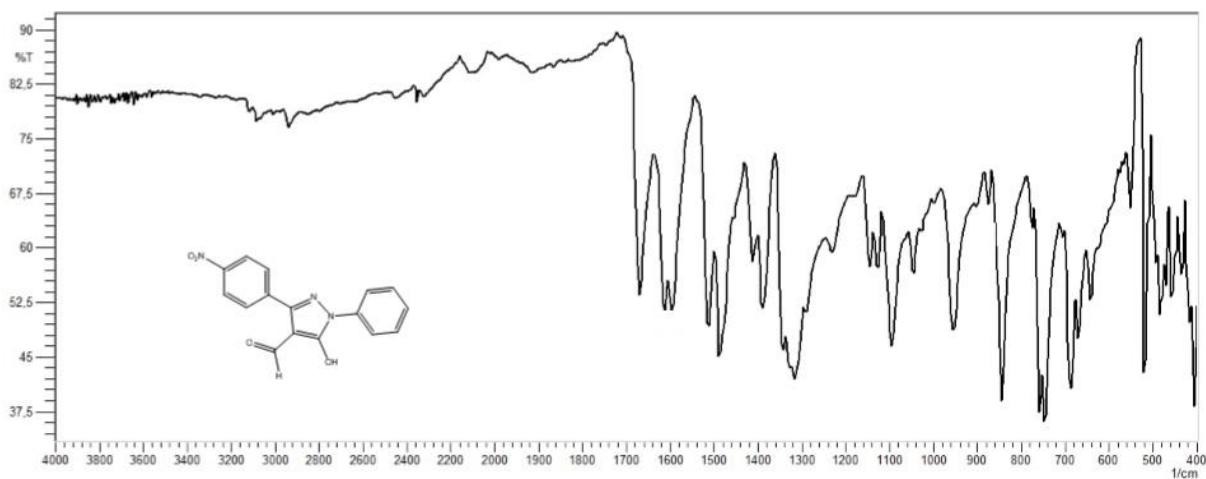

**Figure S5.** FTIR spectrum of 5-hydroxy-3-(4-nitrophenyl)-1-phenyl-4-formyl-1*H*-pyrazole **4d**.

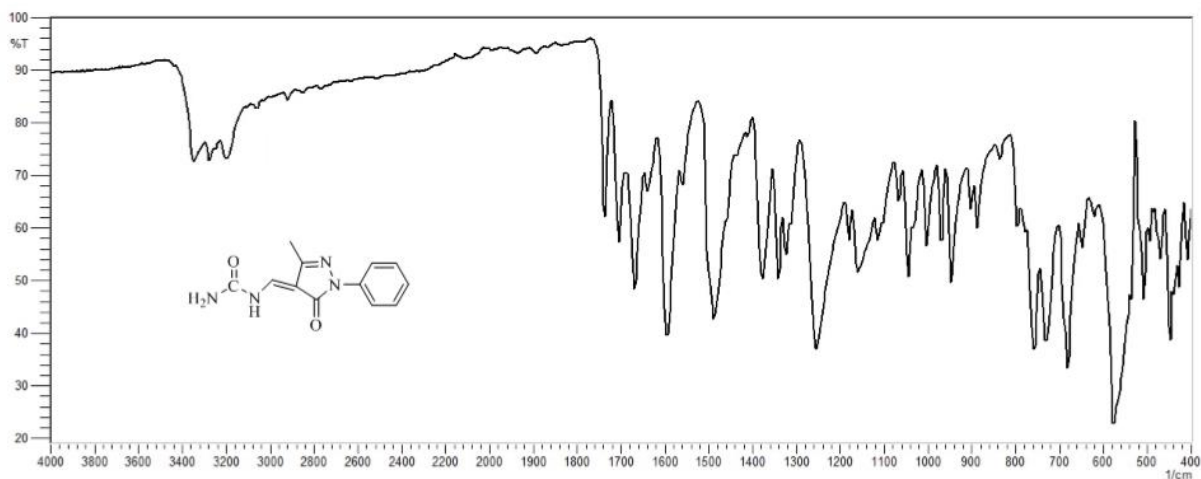

**Figure S6.** FTIR spectrum of N-[(1,5-dihydro-3-methyl-5-oxo-1-phenyl-4*H*-pyrazole-4-ylidene)methyl]urea **5a**.

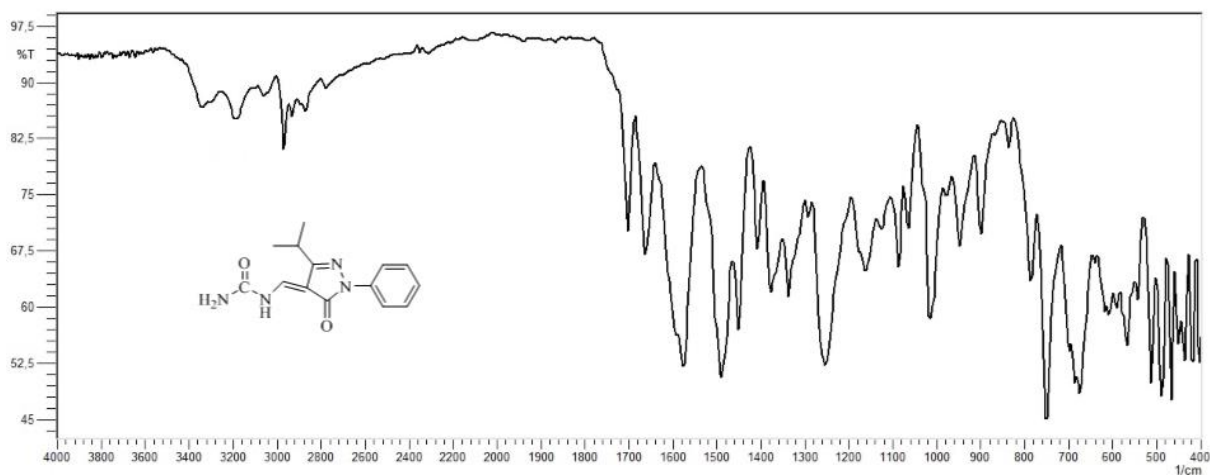

**Figure 7.** FTIR spectrum of N-[(1,5-dihydro-1-phenyl-5-oxo-3-(isopropyl)-4H-pyrazole-4-ylidene)methyl]urea **5b**.

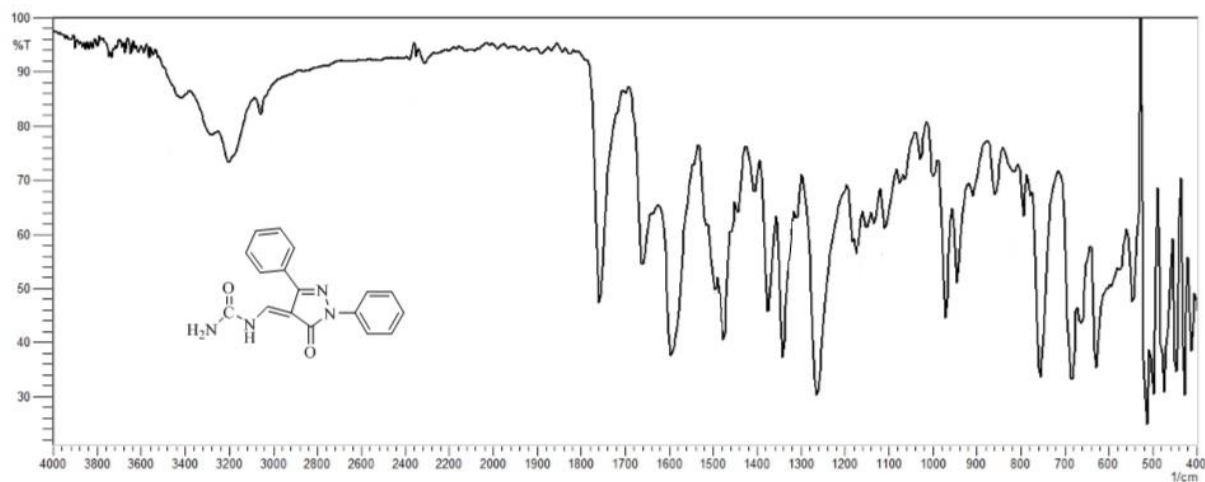

**Figure 8.** FTIR spectrum of N-[(1,5-dihydro-1,3-diphenyl-5-oxo-4H-pyrazole-4-ylidene)methyl]urea **5c**.

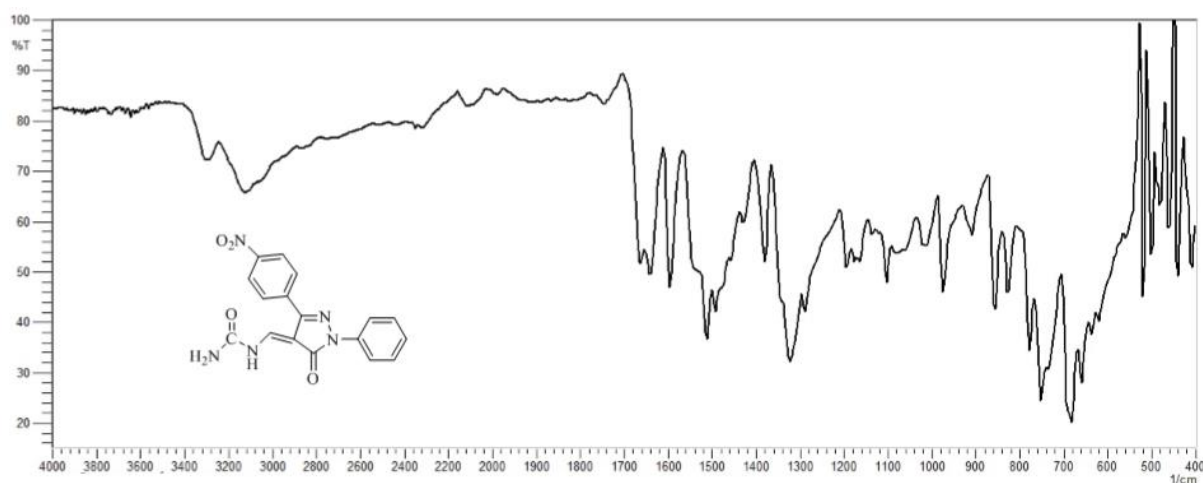

**Figure 9.** FTIR spectrum of N-[(1,5-dihydro-1-phenyl-5-oxo-3-(4-nitrophenyl)-4H-pyrazole-4-ylidene)methyl]urea **5d**.

# $^1\text{H}$ NMR spectra

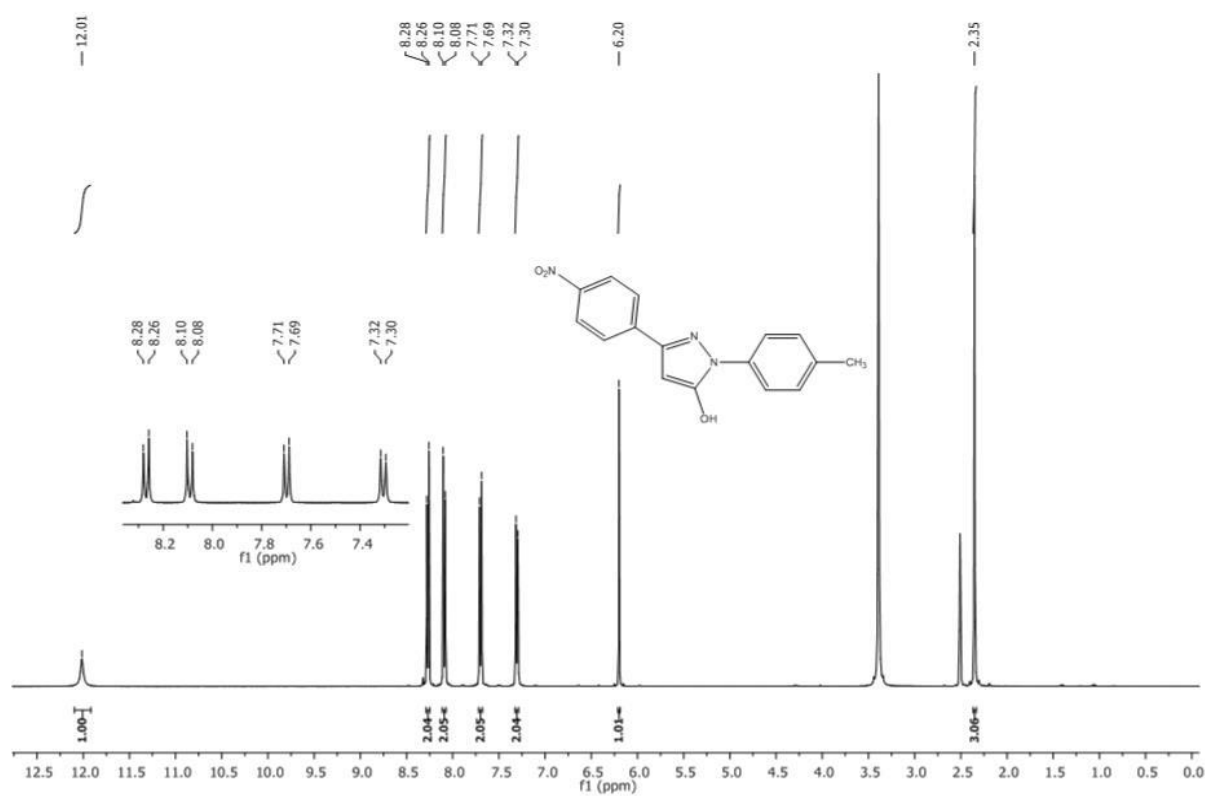

**Figure S10.**  $^1\text{H}$  NMR spectrum in  $\text{DMSO-}d_6$  of 5-hydroxy-3-(4-nitrophenyl)-1-(p-tolyl)-1H-pyrazole **3e**.

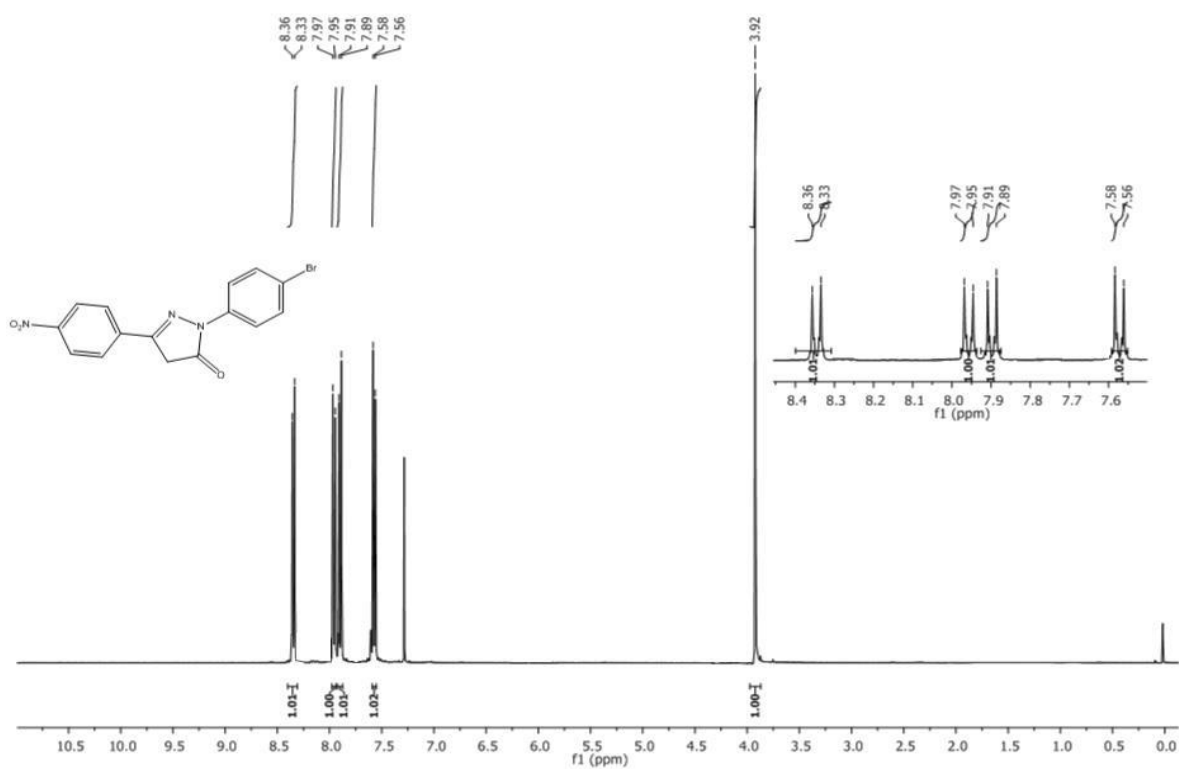

**Figure S11.**  $^1\text{H}$  NMR spectrum in  $\text{CDCl}_3$  of 1-(4-bromophenyl)-3-(4-nitrophenyl)-1H-pyrazole-5(4H)-one **3f**.

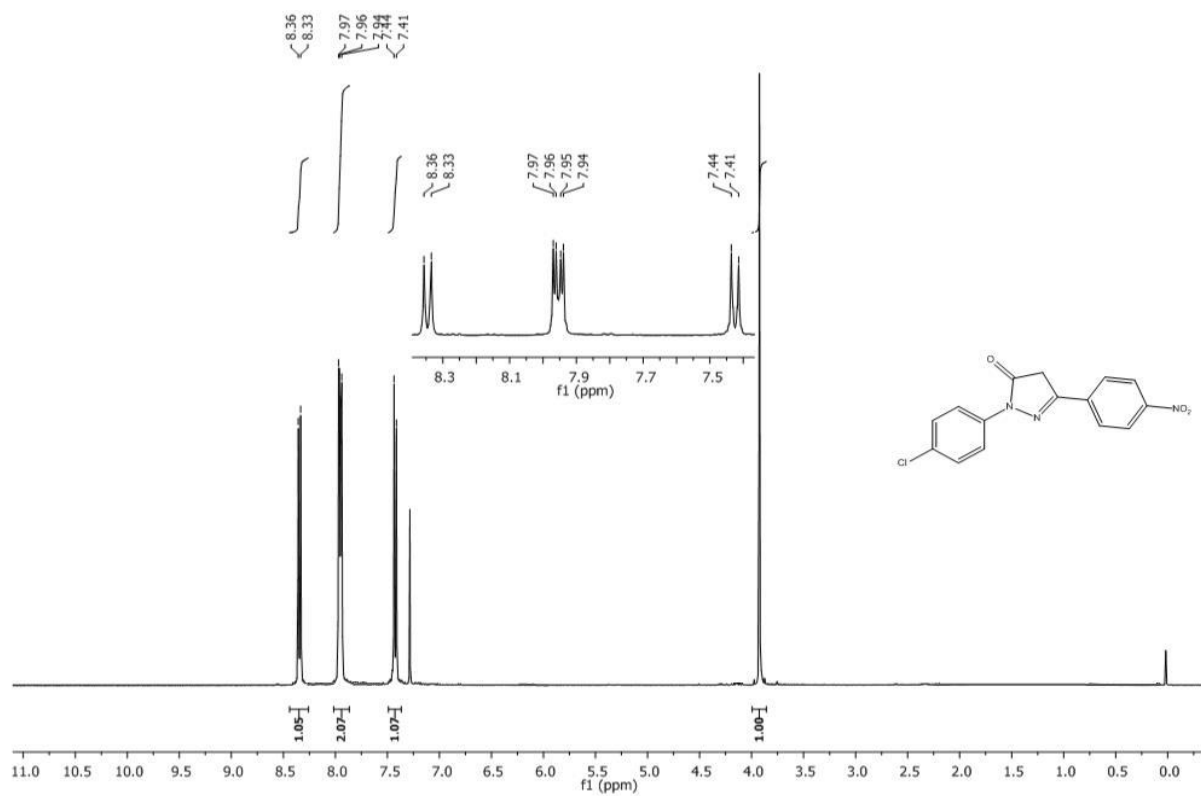

**Figure S12.**  $^1\text{H}$  NMR spectrum in  $\text{CDCl}_3$  of 1-(4-chlorophenyl)-3-(4-nitrophenyl)-1H-pyrazole-5(4H)-one **3g**.

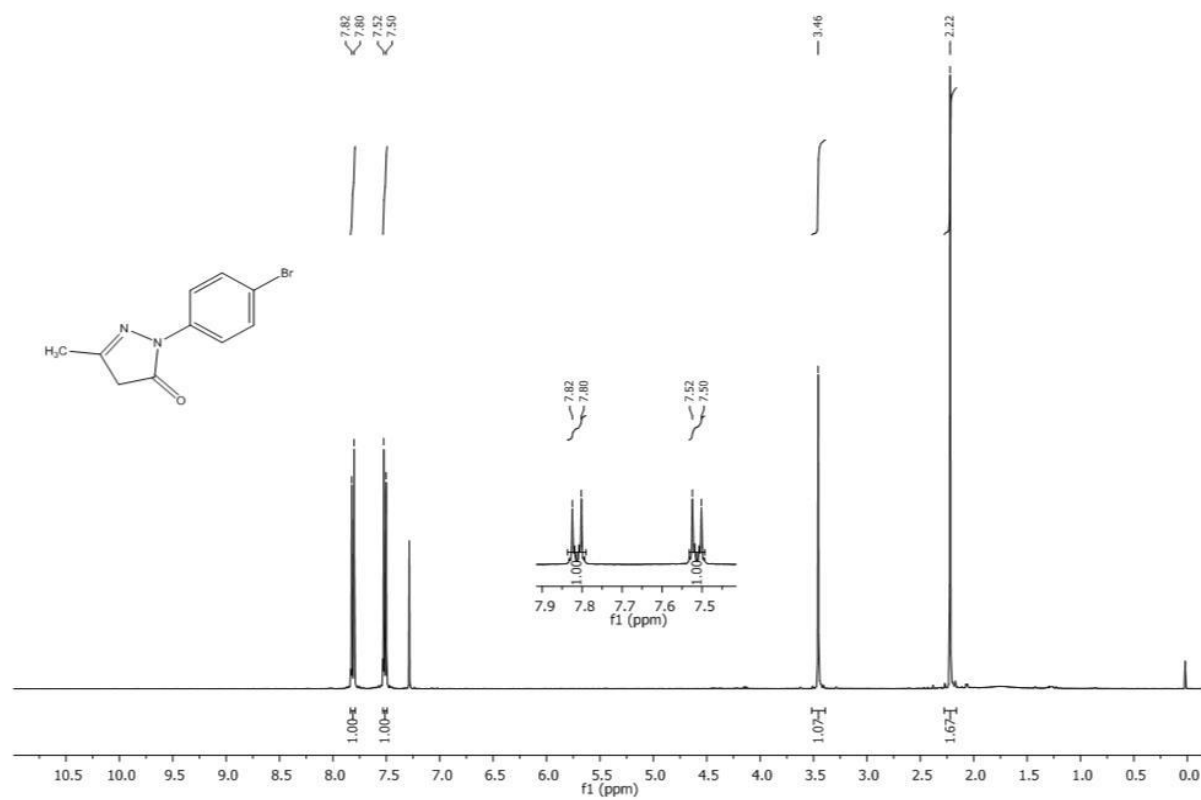

**Figure S13.**  $^1\text{H}$  NMR spectrum in  $\text{CDCl}_3$  of 1-(4-bromophenyl)-3-methyl-1H-pyrazole-5(4H)-one **3h**.

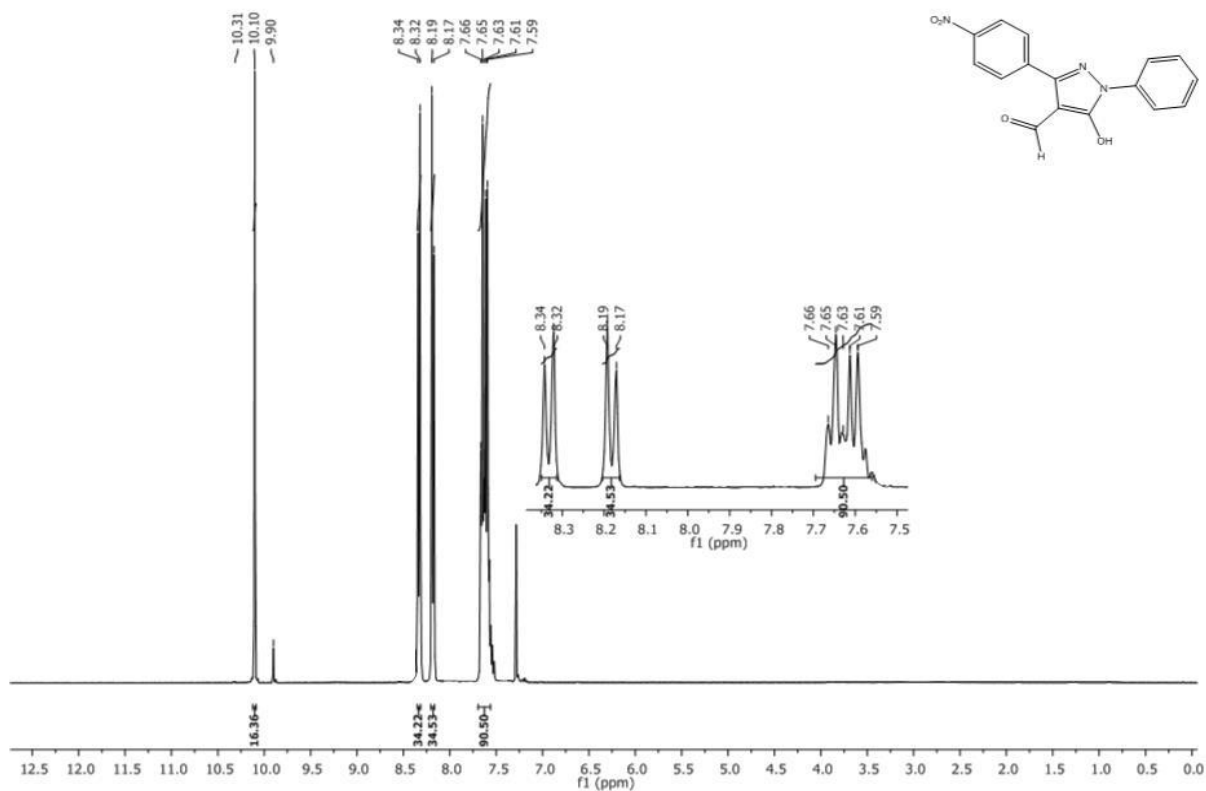

**Figure S14.** <sup>1</sup>H NMR spectrum in CDCl<sub>3</sub> of 5-hydroxy-3-(4-nitrophenyl)-1-phenyl-4-formyl-1H-pyrazole 4d.

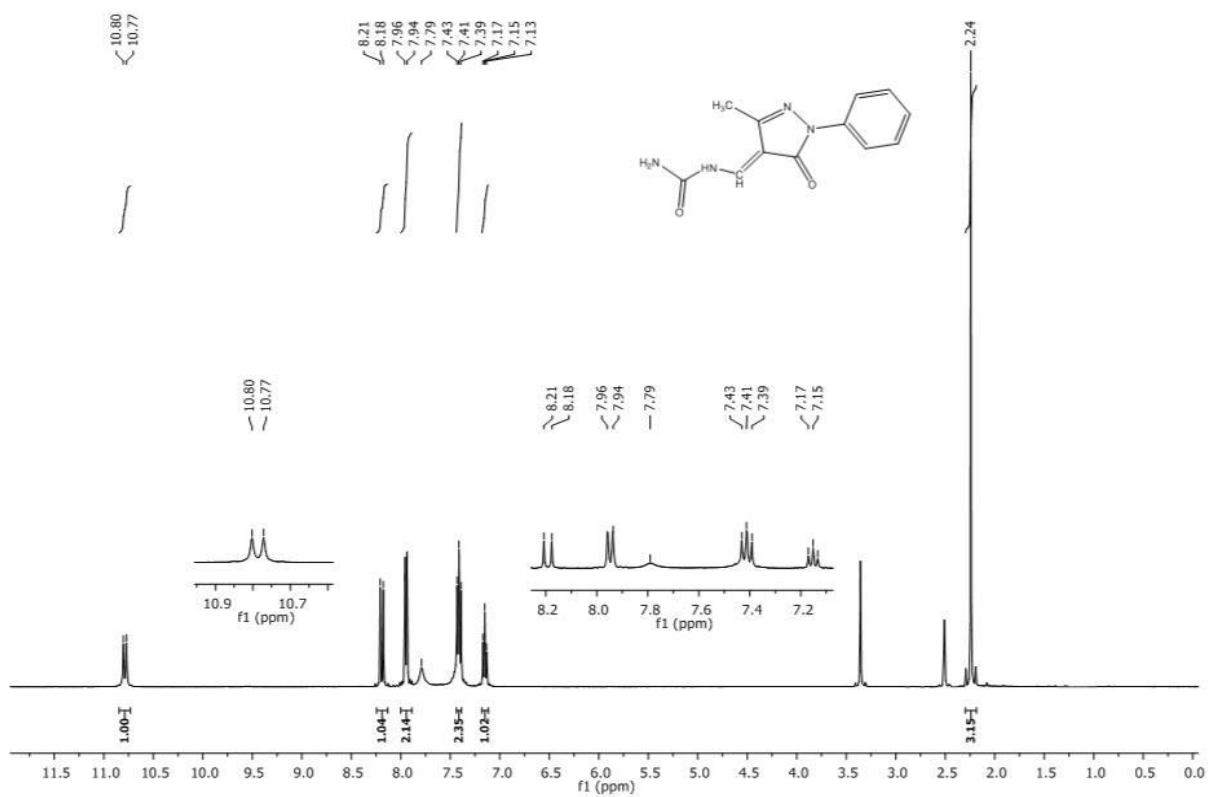

**Figure S15.** <sup>1</sup>H NMR spectrum in DMSO-*d*<sub>6</sub> of N-[(1,5-dihydro-3-methyl-5-oxo-1-phenyl-4H-pyrazole-4-ylidene)methyl]urea 5a.

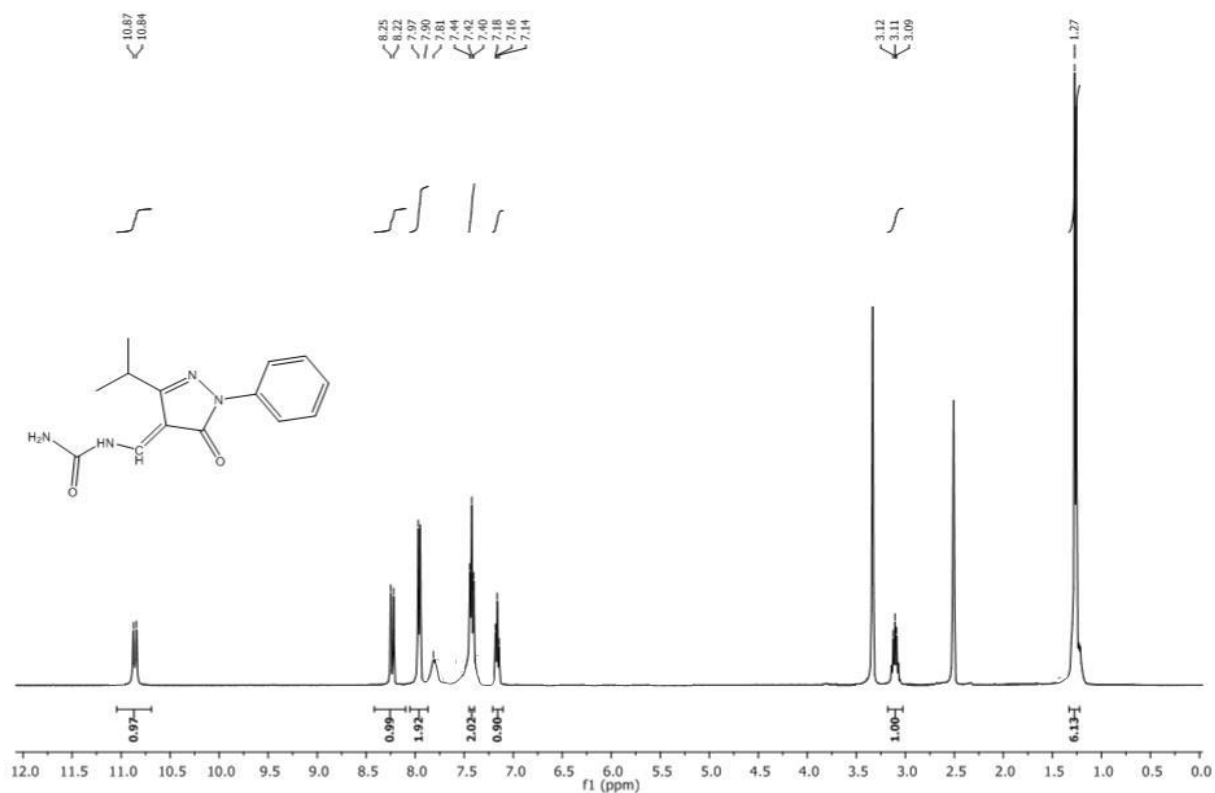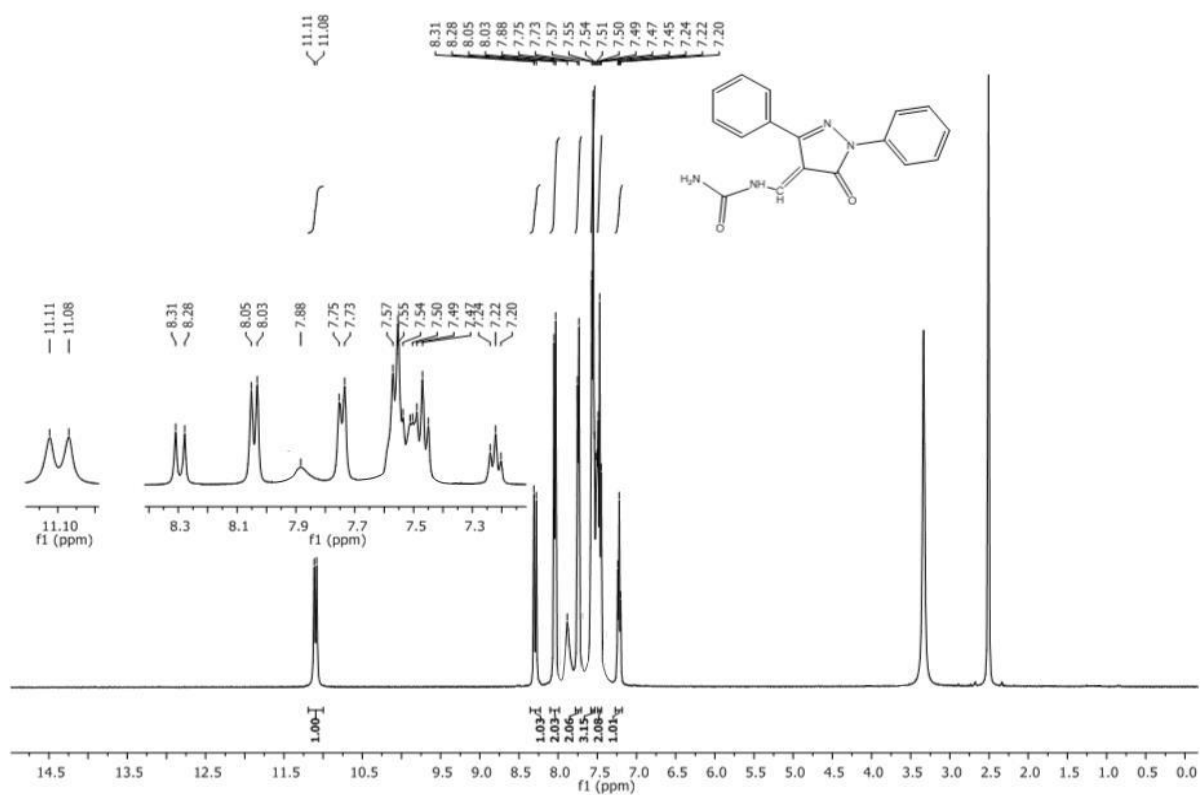



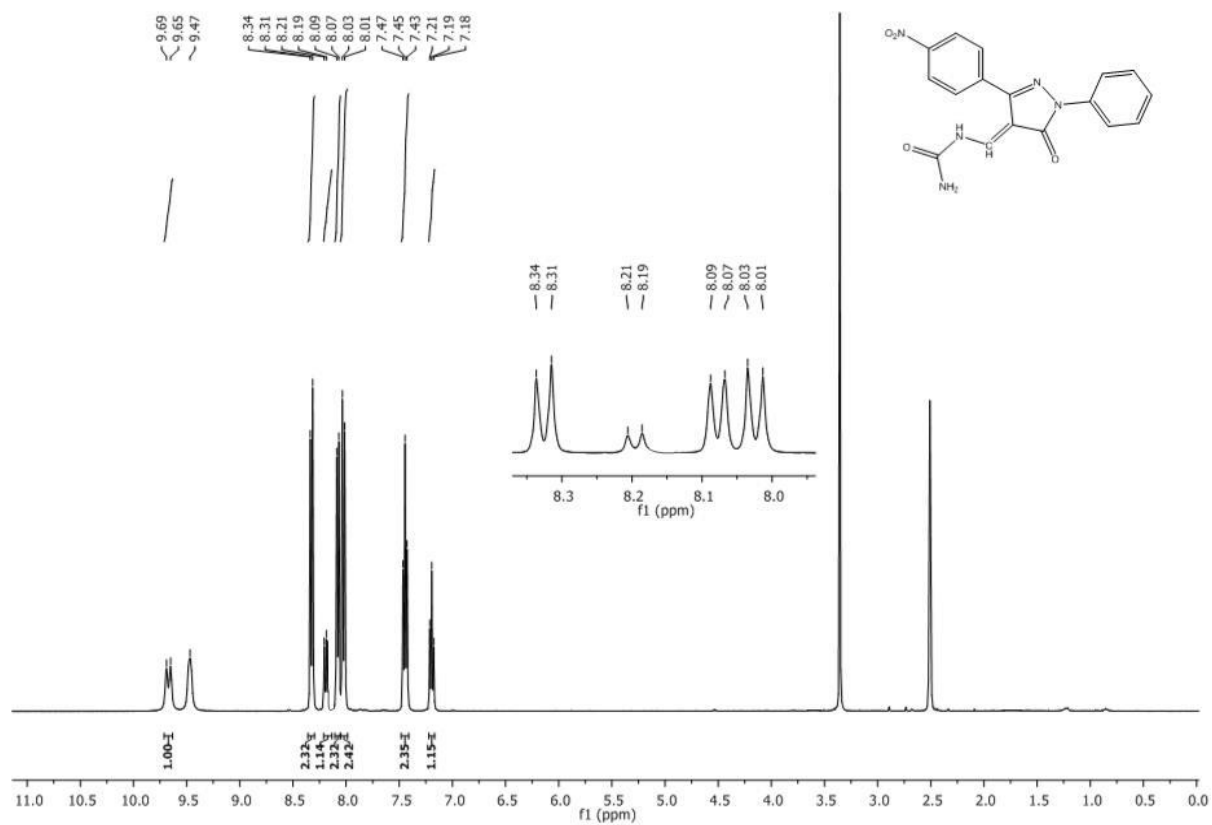

**Figure S18.** <sup>1</sup>H NMR spectrum in DMSO-*d*<sub>6</sub> of N-[(1,5-dihydro-1-phenyl-5-oxo-3-(4-nitrophenyl)-4H-pyrazole-4-ylidene)methyl]urea **5d**.

<sup>13</sup>C NMR spectra

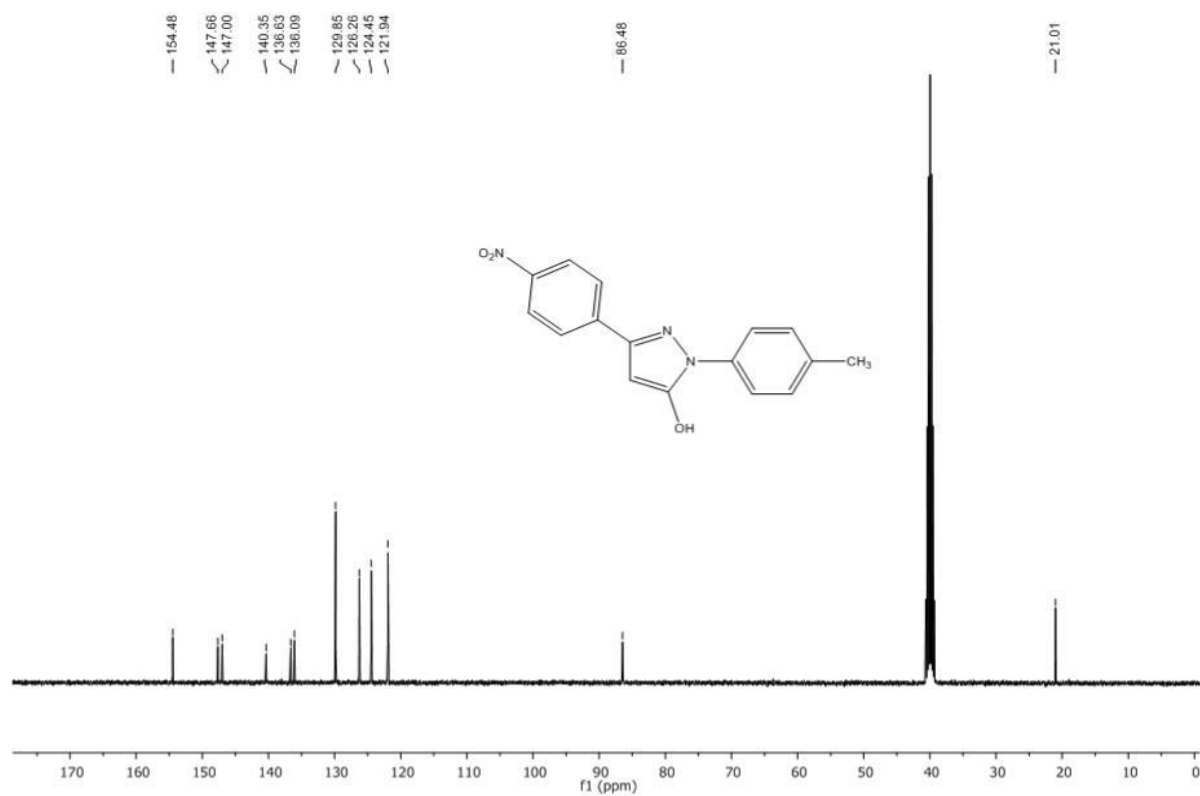

Figure S19. <sup>13</sup>C NMR spectrum in DMSO-*d*<sub>6</sub> of 5-hydroxy-3-(4-nitrophenyl)-1-(p-tolyl)-1H-pyrazole 3e.

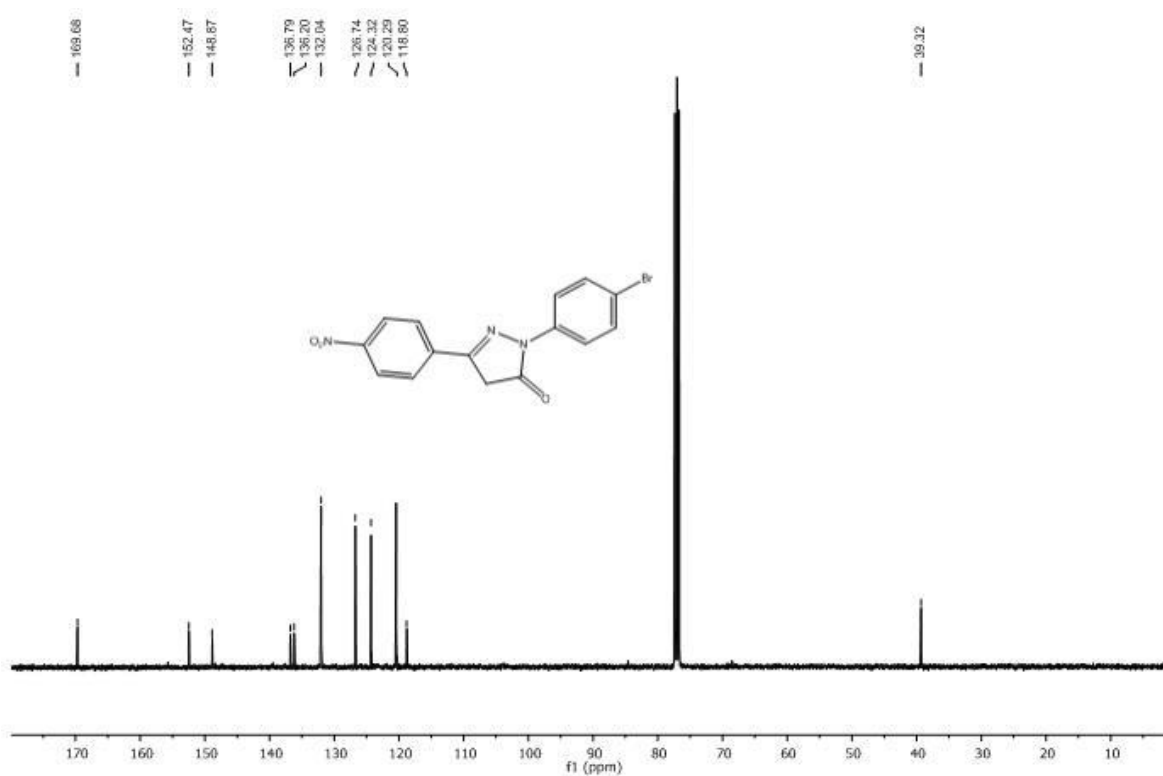

Figure S20. <sup>13</sup>C NMR spectrum in CDCl<sub>3</sub> of 1-(4-bromophenyl)-3-(4-nitrophenyl)-1H-pyrazole-5(4H)-one 3f.

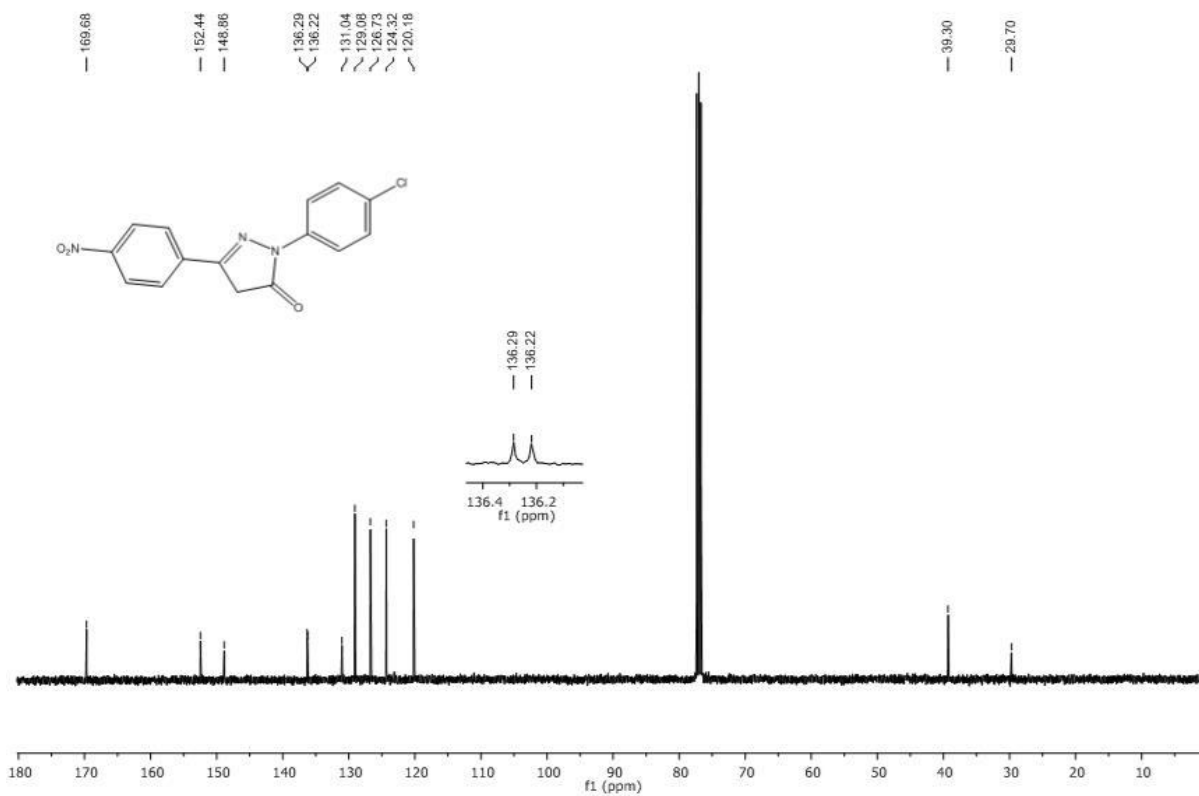

**Figure S21.** <sup>13</sup>C NMR spectrum in CDCl<sub>3</sub> of 1-(4-chlorophenyl)-3-(4-nitrophenyl)-1H-pyrazole-5(4H)-one 3g.

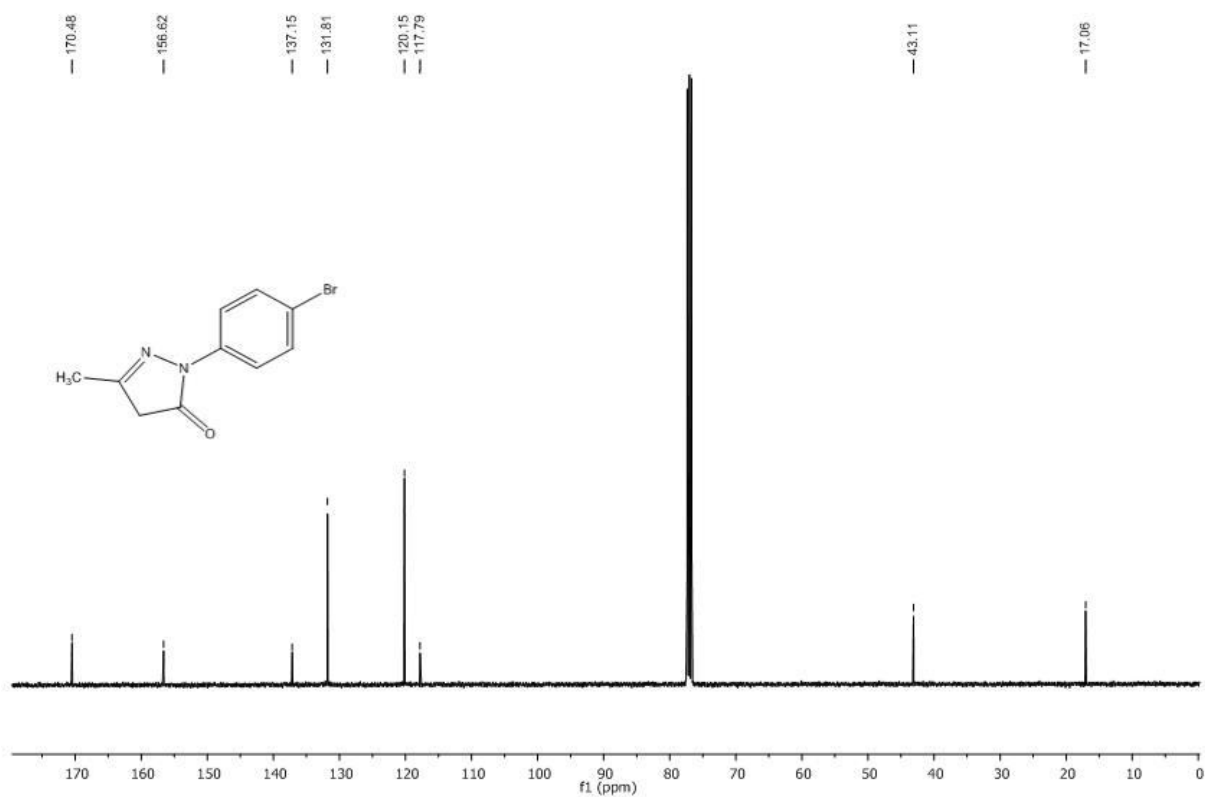

**Figure S22.** <sup>13</sup>C NMR spectrum in CDCl<sub>3</sub> of 1-(4-bromophenyl)-3-methyl-1H-pyrazole-5(4H)-one 3h.

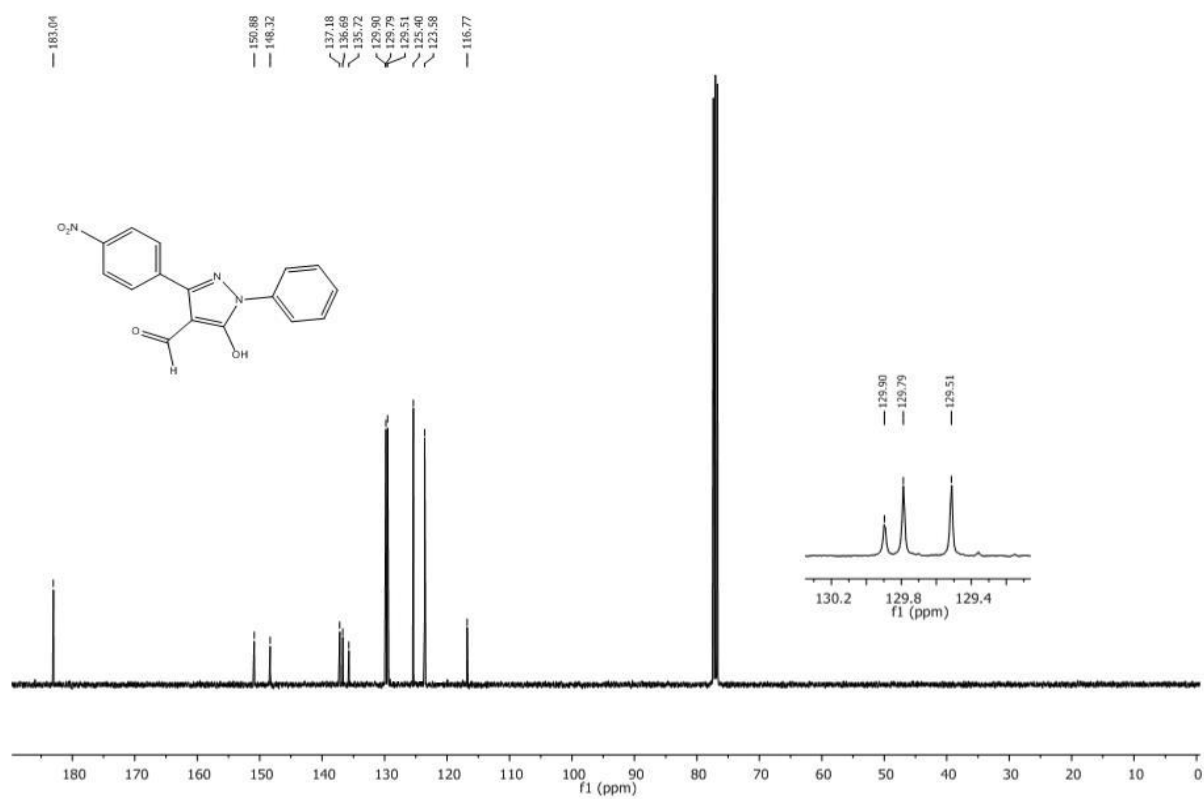

**Figure S23.**  $^{13}\text{C}$  NMR spectrum in  $\text{CDCl}_3$  of 5-hydroxy-3-(4-nitrophenyl)-1-phenyl-4-formyl-1H-pyrazole 4d.

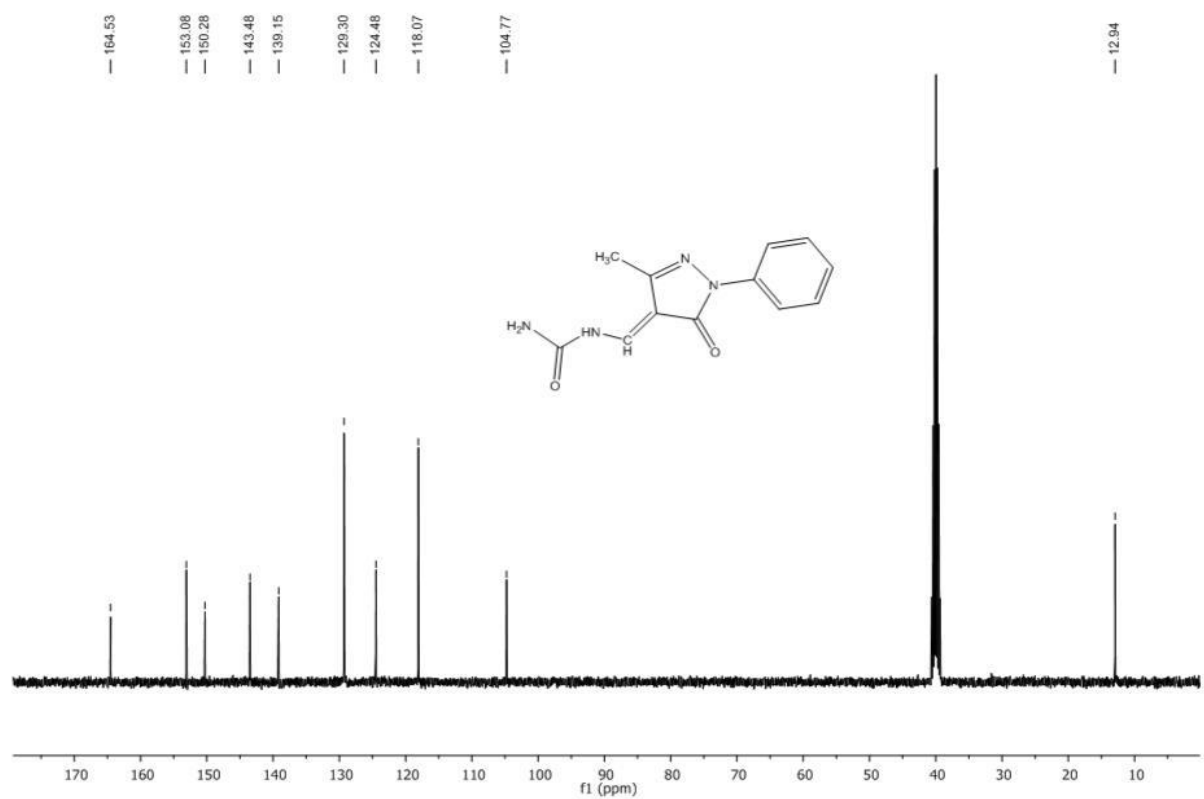

**Figure S24.**  $^{13}\text{C}$  NMR spectrum in  $\text{DMSO}-d_6$  of N-[(1,5-dihydro-3-methyl-5-oxo-1-phenyl-4H-pyrazole-4-ylidene)methyl]urea 5a.

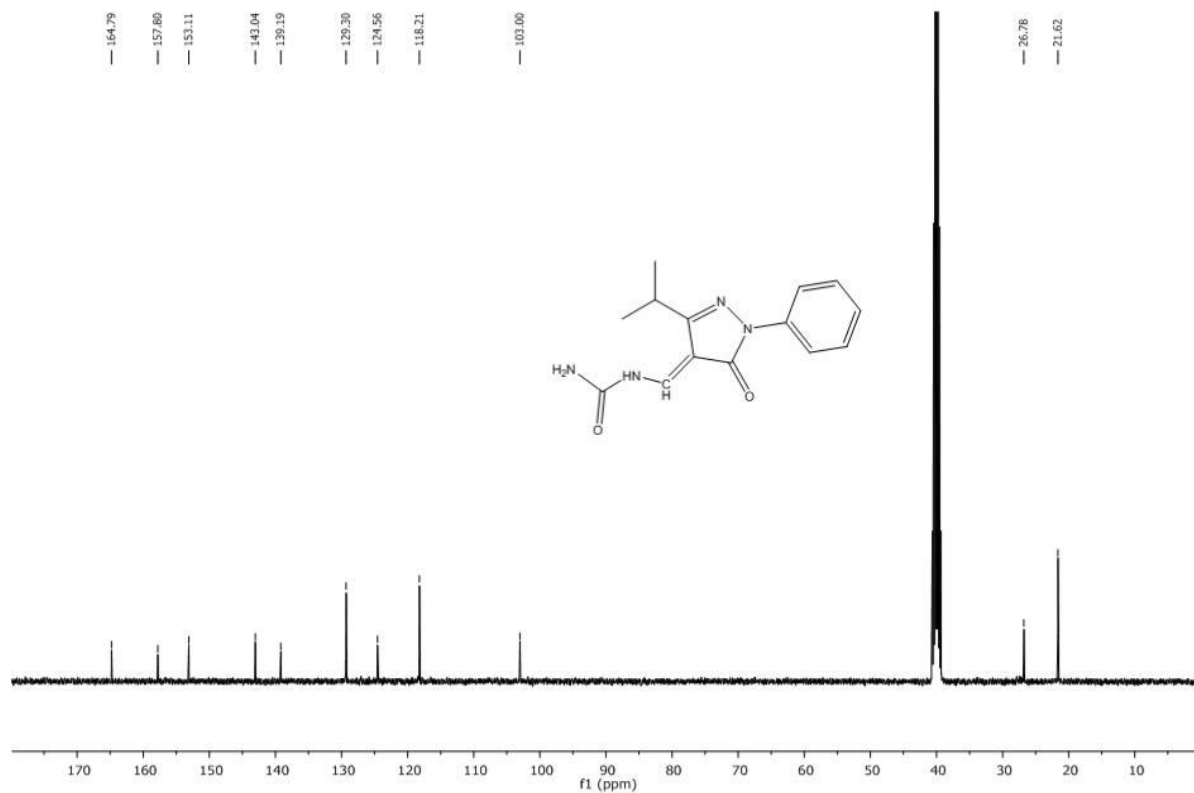

**Figure S25.** <sup>13</sup>C NMR spectrum in DMSO-*d*<sub>6</sub> of N-[(1,5-dihydro-1-phenyl-5-oxo-3-(isopropyl)-4*H*-pyrazole-4-ylidene)methyl]urea **5b**.

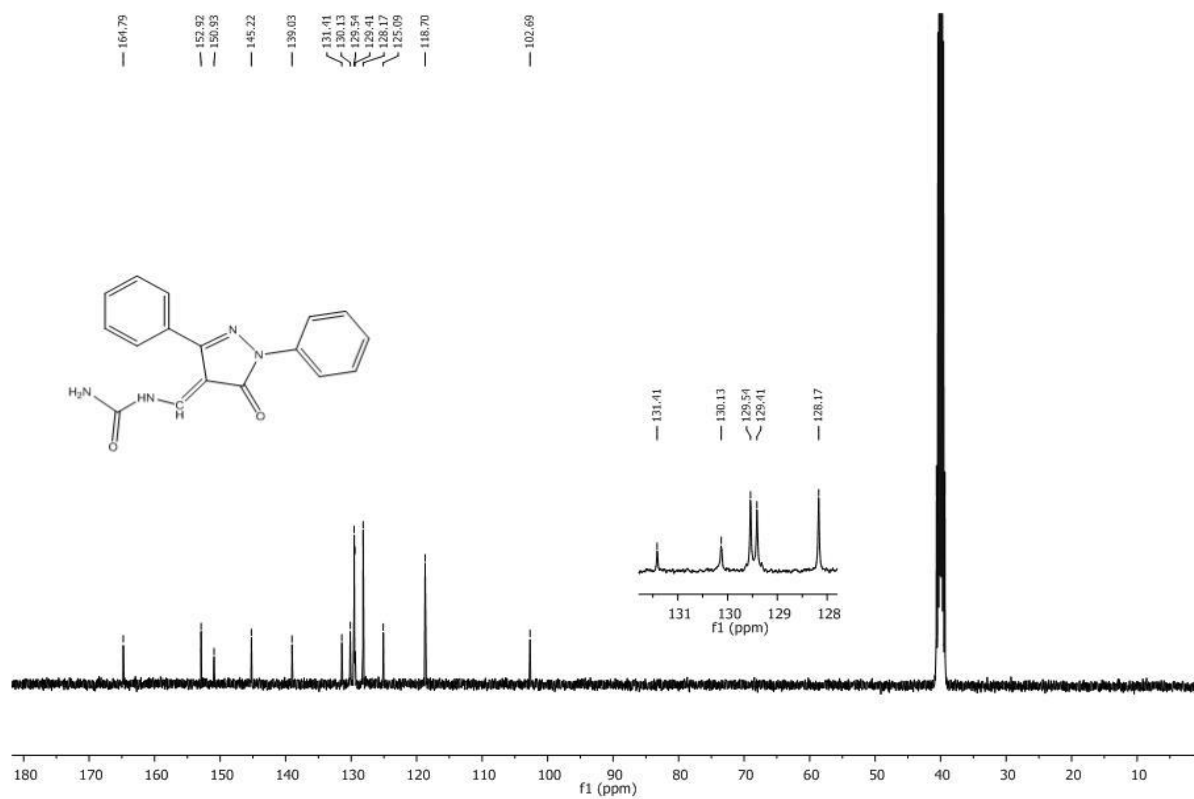

**Figure S26.** <sup>13</sup>C NMR spectrum in DMSO-*d*<sub>6</sub> of N-[(1,5-dihydro-1,3-diphenyl-5-oxo-4*H*-pyrazole-4-ylidene)methyl]urea **5c**.

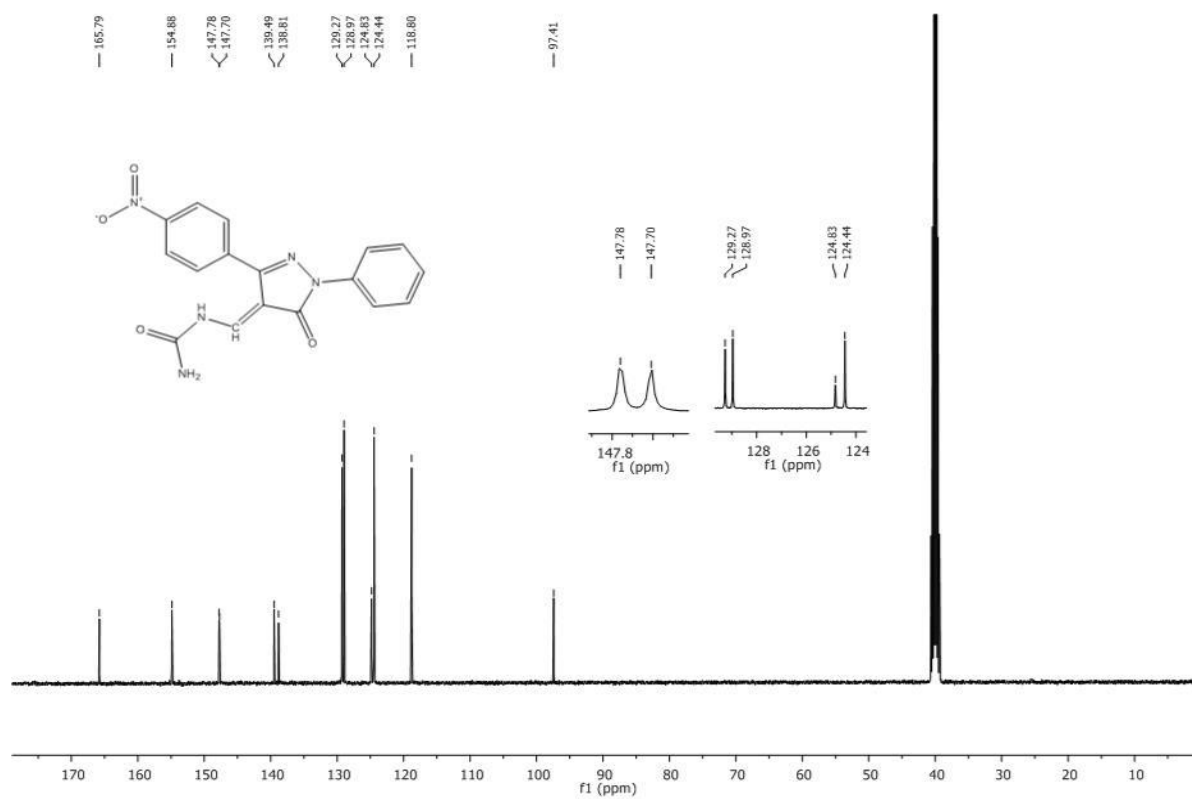

**Figure S27.** <sup>13</sup>C NMR spectrum in DMSO-*d*<sub>6</sub> of N-[(1,5-dihydro-1-phenyl-5-oxo-3-(4-nitrophenyl)-4*H*-pyrazole-4-ylidene)methyl]urea **5d**.

## LC-MS/MS spectra

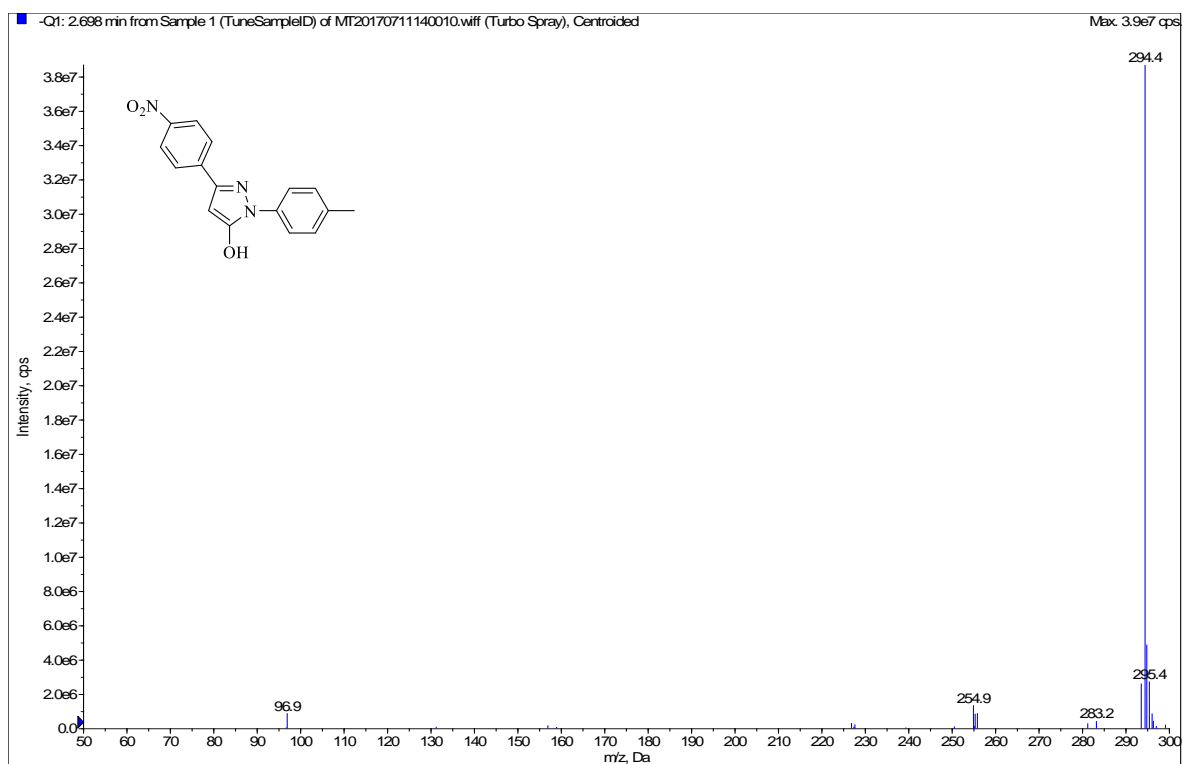

Figure S28. LC-MS/MS spectrum of 5-hydroxy-3-(4-nitrophenyl)-1-(p-tolyl)-1H-pyrazole **3e**.

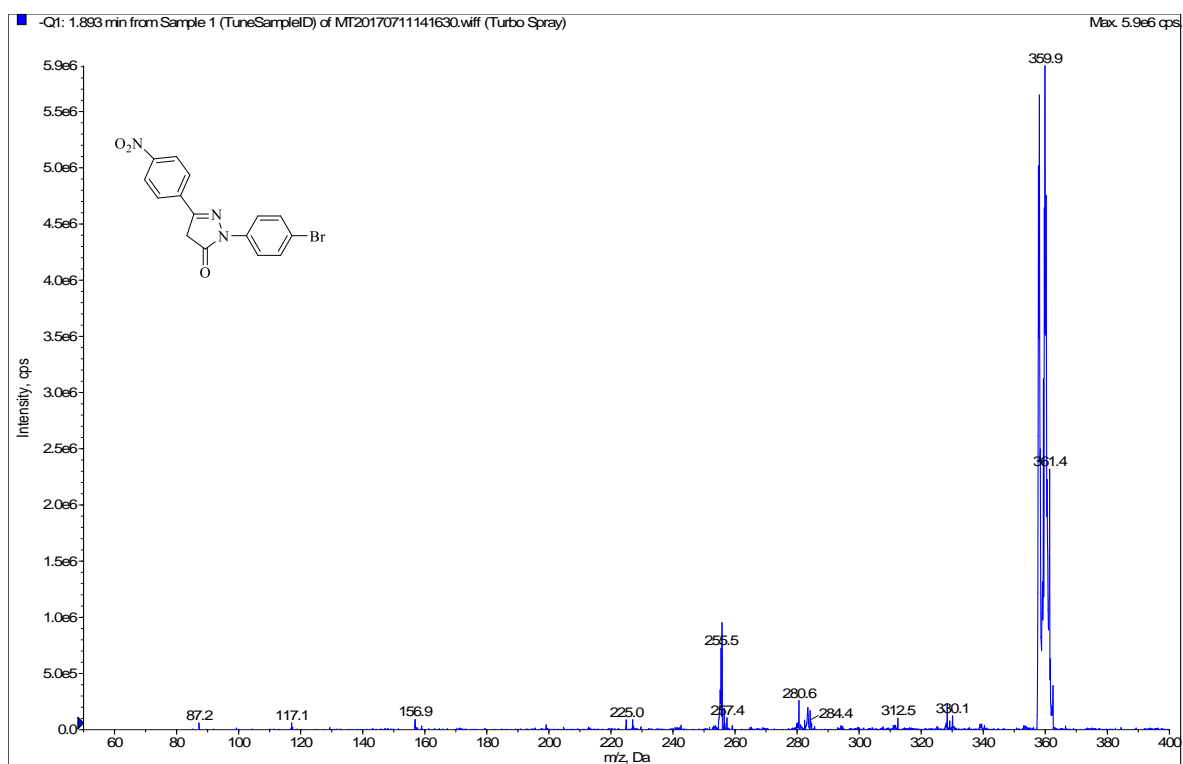

Figure S29. LC-MS/MS spectrum of 1-(4-bromophenyl)-3-(4-nitrophenyl)-1H-pyrazole-5(4H)-one **3f**.

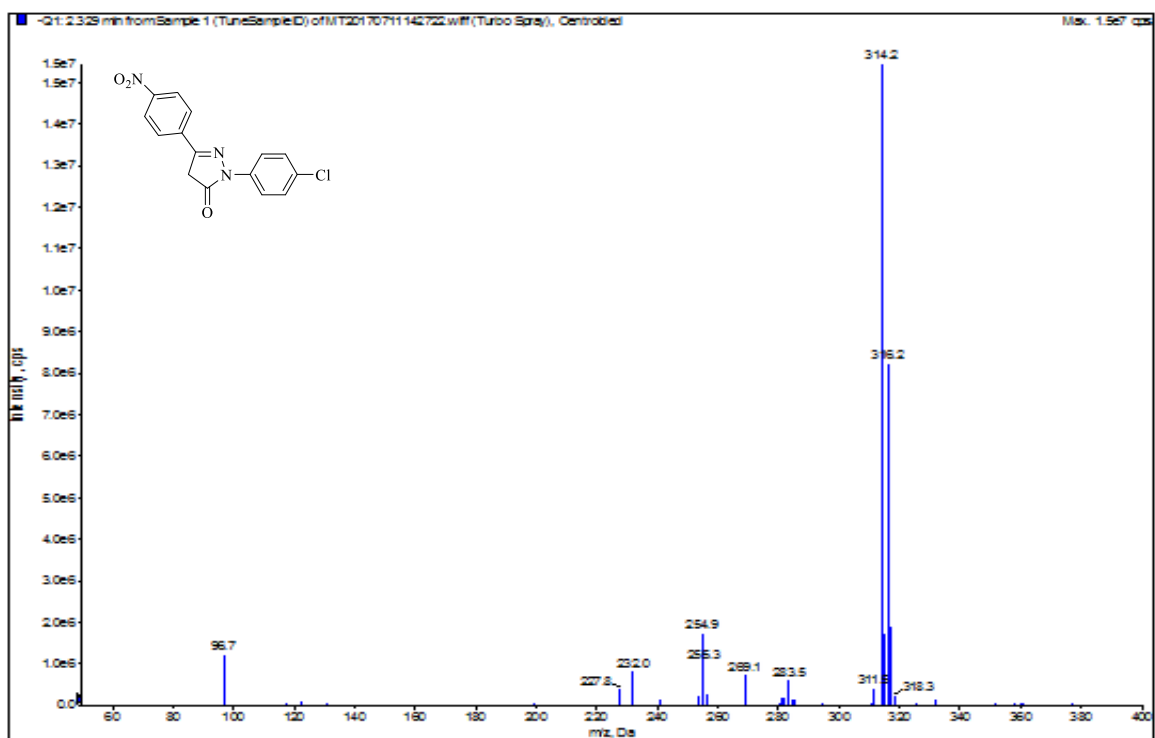

Figure S30. LC-MS/MS spectrum of 1-(4-chlorophenyl)-3-(4-nitrophenyl)-1H-pyrazole-5(4H)-one **3g**.

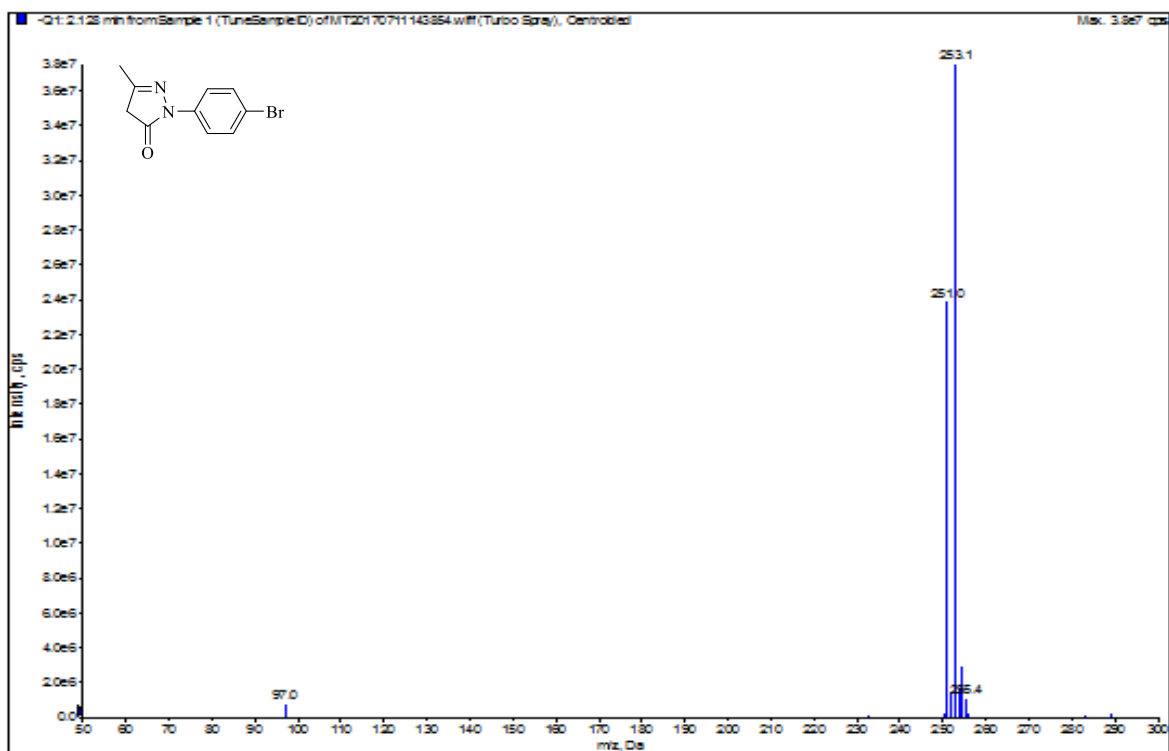

Figure S31. LC-MS/MS spectrum of 1-(4-bromophenyl)-3-methyl-1H-pyrazole-5(4H)-one **3h**.



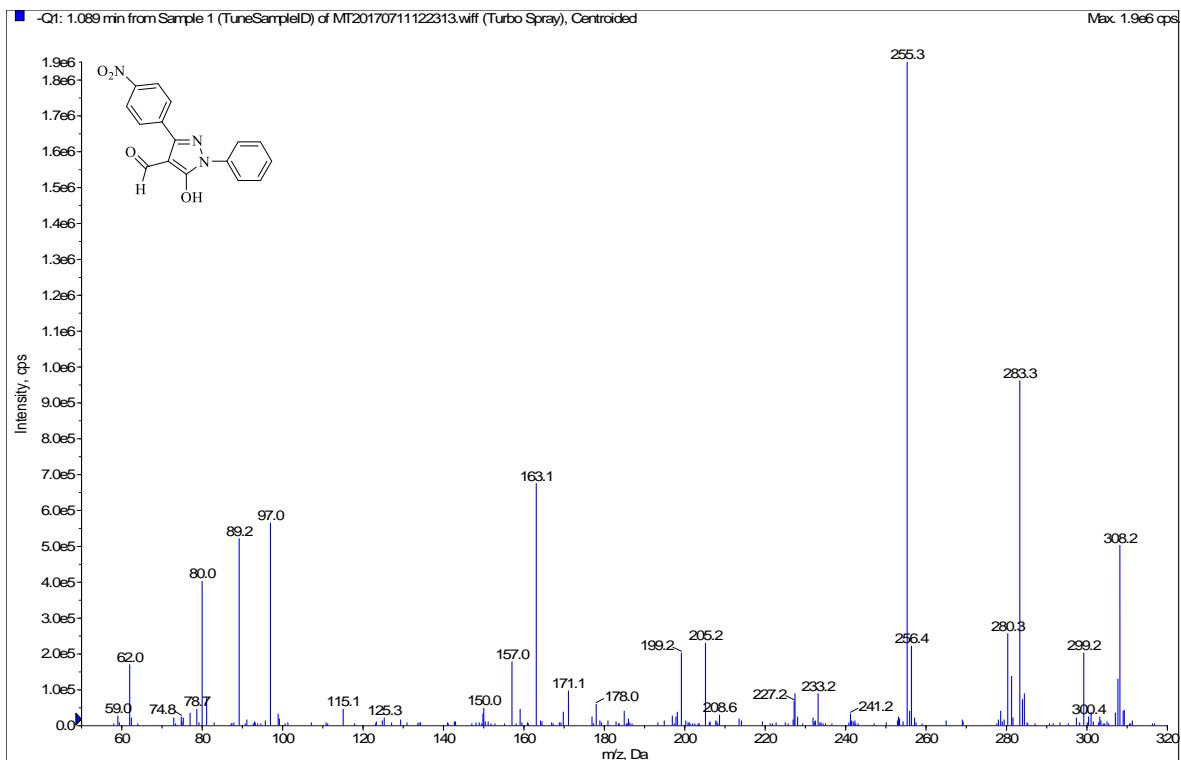

Figure S32. LC-MS/MS spectrum of 5-hydroxy-3-(4-nitrophenyl)-1-phenyl-4-formyl-1H-pyrazole 4d.

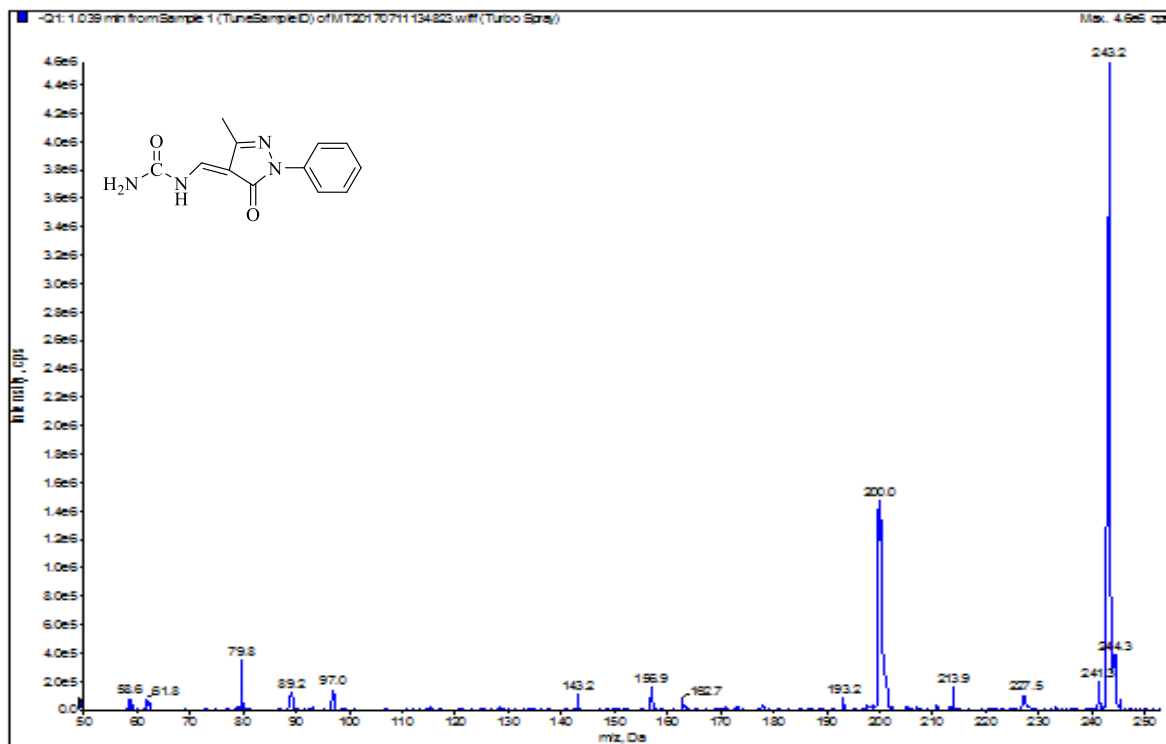

Figure S33. LC-MS/MS spectrum of N-[(1,5-dihydro-3-methyl-5-oxo-1-phenyl-4H-pyrazole-4-ylidene)methyl]urea 5a.

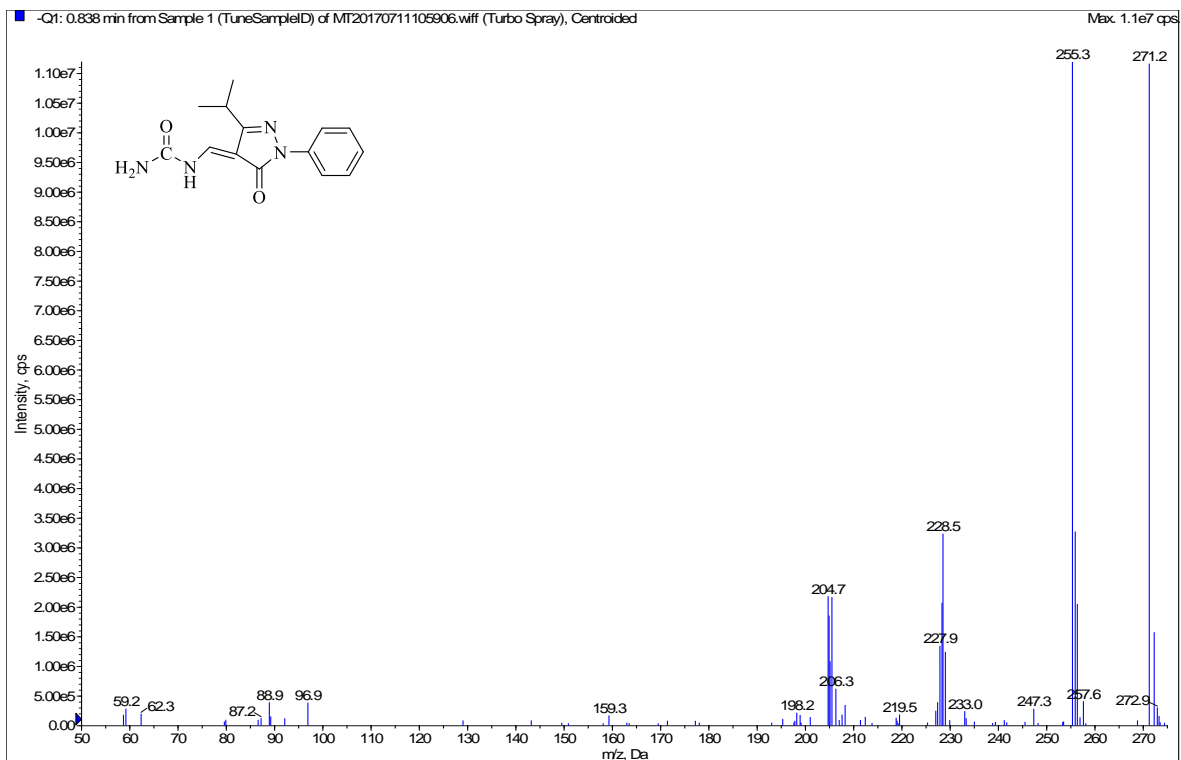

**Figure S34.** LC-MS/MS spectrum of N-[(1,5-dihydro-1-phenyl-5-oxo-3-(isopropyl)-4H-pyrazole-4-ylidene)methyl]urea **5b**.

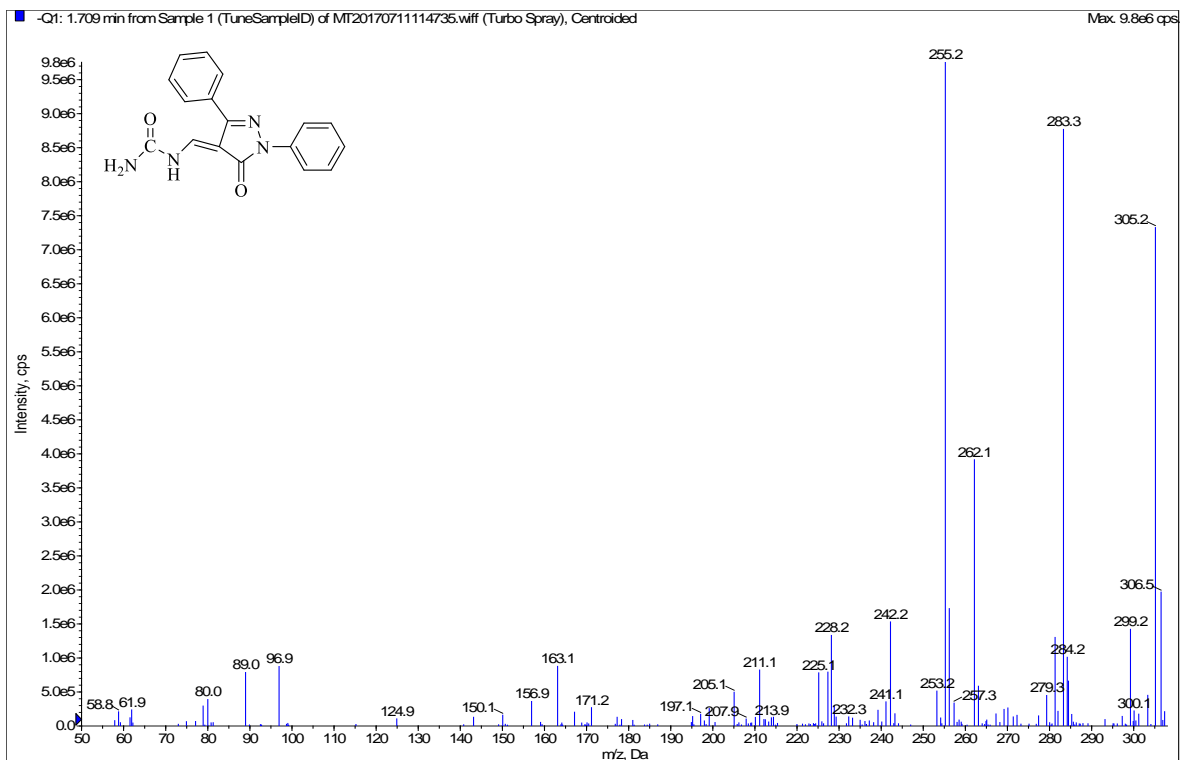

**Figure S35.** LC-MS/MS spectrum of N-[(1,5-dihydro-1,3-diphenyl-5-oxo-4H-pyrazole-4-ylidene)methyl]urea **5c**.

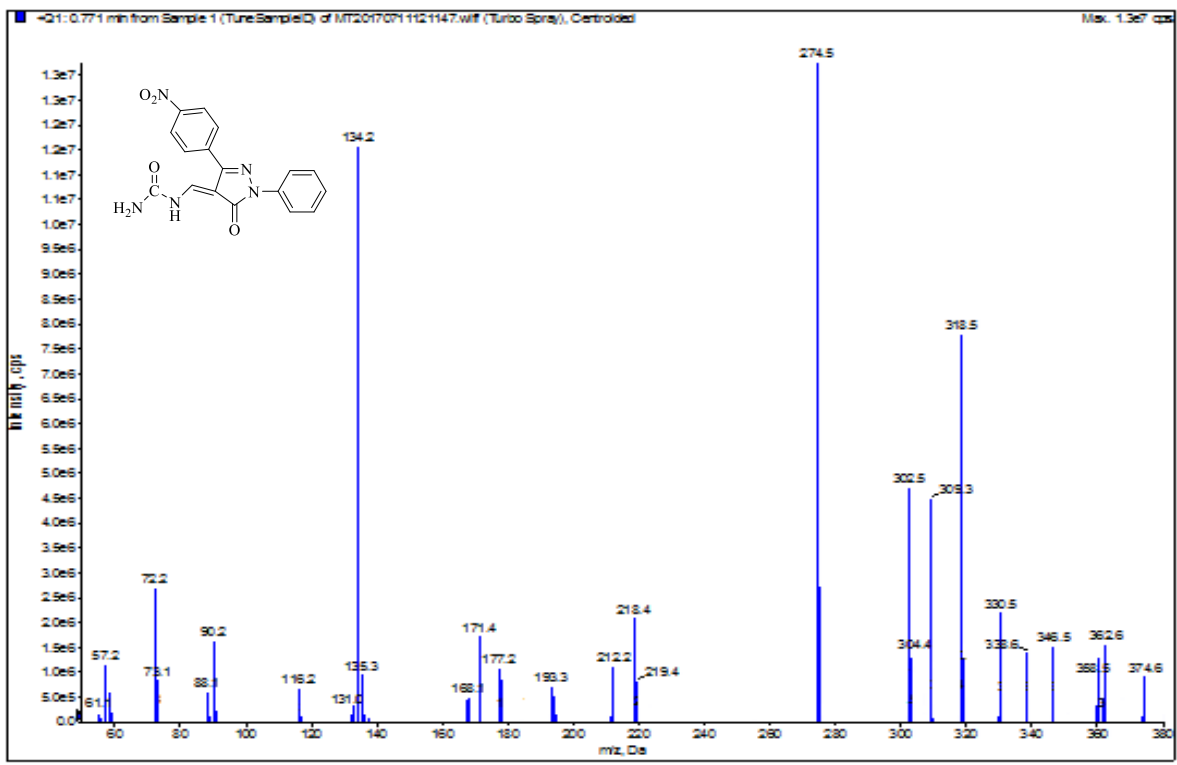

**Figure S36.** LC-MS/MS spectrum of N-[(1,5-dihydro-1-phenyl-5-oxo-3-(4-nitrophenyl)-4H-pyrazole-4-ylidene)methyl]urea **5d**.

## Elemental analysis results

**Table 1.** Elemental analysis results of compounds.

| No | Compounds                                                                           | Formula                                                         | Results |                |           |
|----|-------------------------------------------------------------------------------------|-----------------------------------------------------------------|---------|----------------|-----------|
|    |                                                                                     |                                                                 | Element | Calculated [%] | Found [%] |
| 3e | 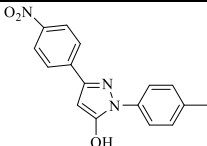   | C <sub>16</sub> H <sub>13</sub> N <sub>3</sub> O <sub>3</sub>   | C       | 65.08          | 64.97     |
|    |                                                                                     |                                                                 | H       | 4.44           | 4.54      |
|    |                                                                                     |                                                                 | N       | 14.23          | 14.17     |
| 3f |    | C <sub>15</sub> H <sub>10</sub> BrN <sub>3</sub> O <sub>3</sub> | C       | 50.02          | 49.86     |
|    |                                                                                     |                                                                 | H       | 2.80           | 2.83      |
|    |                                                                                     |                                                                 | N       | 11.67          | 11.55     |
| 3g |    | C <sub>15</sub> H <sub>10</sub> ClN <sub>3</sub> O <sub>3</sub> | C       | 57.07          | 56.79     |
|    |                                                                                     |                                                                 | H       | 3.19           | 3.29      |
|    |                                                                                     |                                                                 | N       | 13.31          | 13.87     |
| 3h |    | C <sub>10</sub> H <sub>9</sub> BrN <sub>2</sub> O               | C       | 47.46          | 47.54     |
|    |                                                                                     |                                                                 | H       | 3.58           | 3.54      |
|    |                                                                                     |                                                                 | N       | 11.07          | 11.14     |
| 4d |   | C <sub>16</sub> H <sub>11</sub> N <sub>3</sub> O <sub>4</sub>   | C       | 62.14          | 62.06     |
|    |                                                                                     |                                                                 | H       | 3.59           | 3.50      |
|    |                                                                                     |                                                                 | N       | 13.59          | 13.65     |
| 5a |  | C <sub>12</sub> H <sub>12</sub> N <sub>4</sub> O <sub>2</sub>   | C       | 59.01          | 58.93     |
|    |                                                                                     |                                                                 | H       | 4.95           | 4.81      |
|    |                                                                                     |                                                                 | N       | 22.94          | 23.07     |
| 5b |  | C <sub>14</sub> H <sub>16</sub> N <sub>4</sub> O <sub>2</sub>   | C       | 61.75          | 61.88     |
|    |                                                                                     |                                                                 | H       | 5.92           | 5.86      |
|    |                                                                                     |                                                                 | N       | 20.58          | 20.77     |
| 5c |  | C <sub>17</sub> H <sub>14</sub> N <sub>4</sub> O <sub>2</sub>   | C       | 66.66          | 66.9      |
|    |                                                                                     |                                                                 | H       | 4.61           | 4.50      |
|    |                                                                                     |                                                                 | N       | 18.29          | 18.50     |
| 5d |  | C <sub>17</sub> H <sub>13</sub> N <sub>5</sub> O <sub>4</sub>   | C       | 58.12          | 58.26     |
|    |                                                                                     |                                                                 | H       | 3.73           | 3.70      |
|    |                                                                                     |                                                                 | N       | 19.93          | 20.16     |

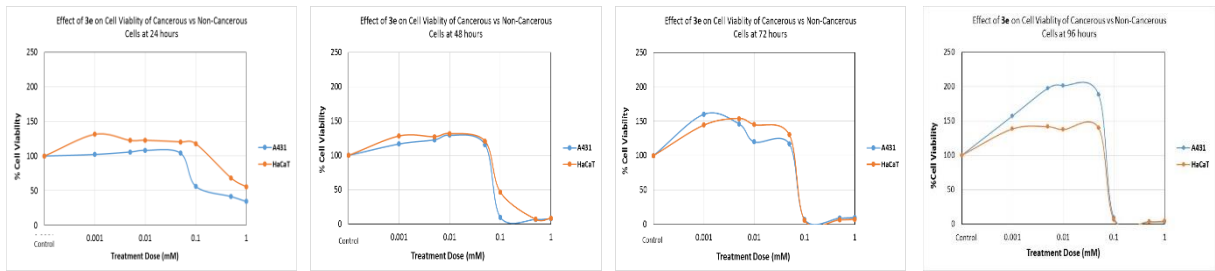

**Figure S37.** Effects of **3e** on Cell Viability of Cancerous vs Non-Cancerous Cells at 24, 48, 72, and 96 Hours.

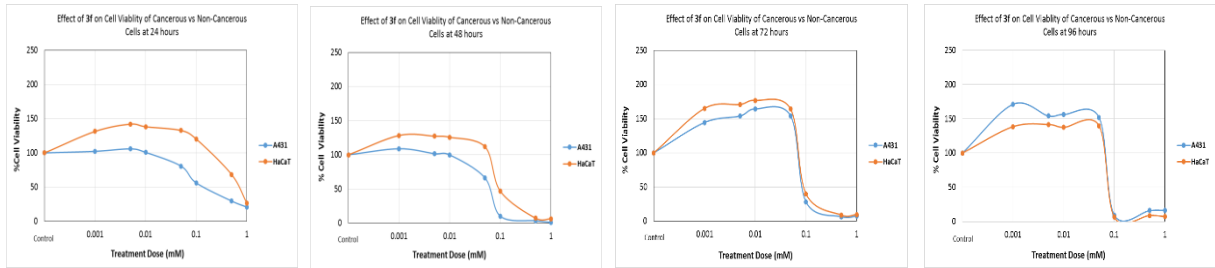

**Figure S38.** Effects of **3f** on Cell Viability of Cancerous vs Non-Cancerous Cells at 24, 48, 72, and 96 Hours.

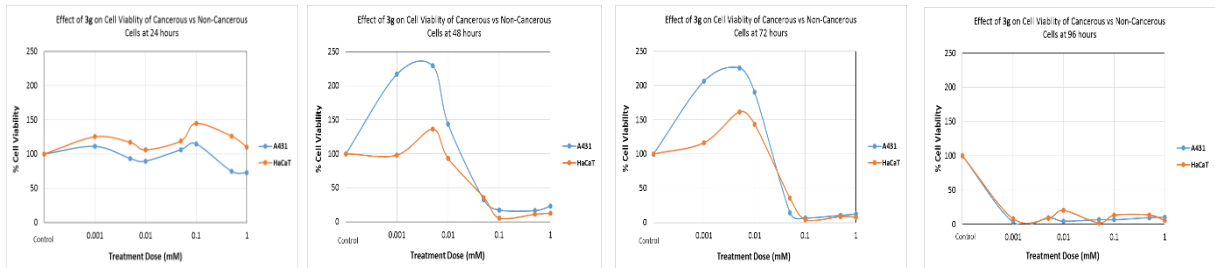

**Figure S39.** Effects of **3g** on Cell Viability of Cancerous vs Non-Cancerous Cells at 24, 48, 72, and 96 Hours.

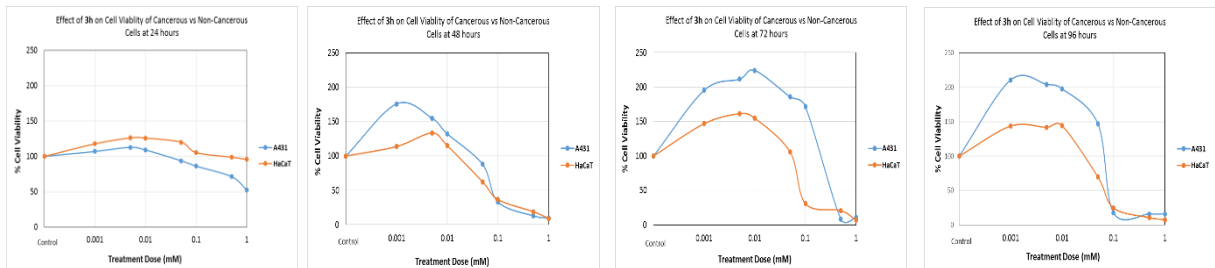

**Figure S40.** Effects of **3h** on Cell Viability of Cancerous vs Non-Cancerous Cells at 24, 48, 72, and 96 Hours.

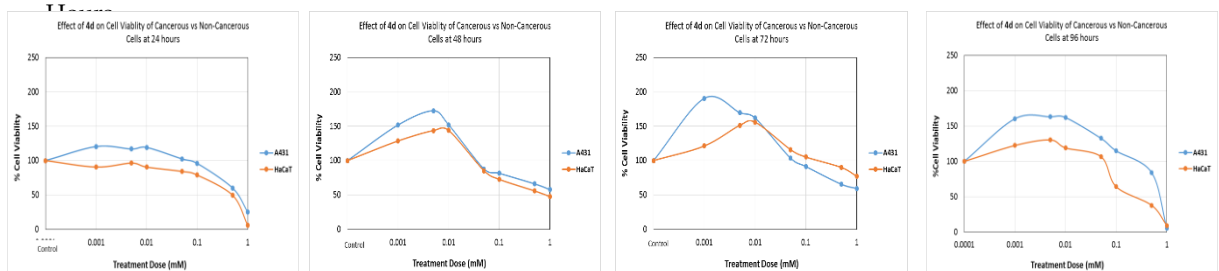

**Figure S41.** Effects of **4d** on Cell Viability of Cancerous vs Non-Cancerous Cells at 24, 48, 72, and 96 Hours.

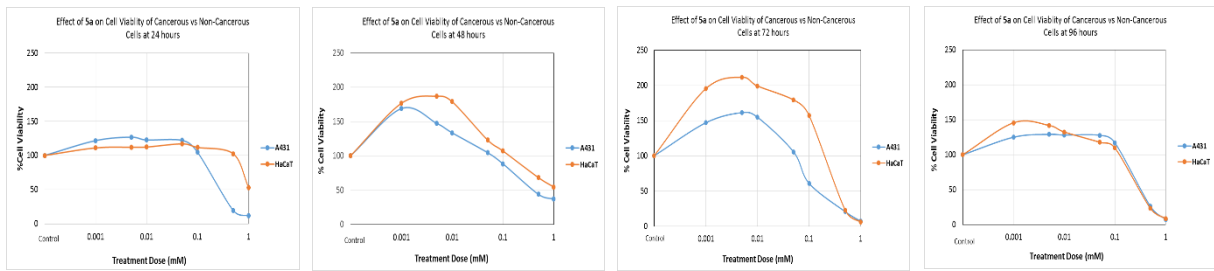

**Figure S42.** Effects of **5a** on Cell Viability of Cancerous vs Non-Cancerous Cells at 24, 48, 72, and 96 Hours.

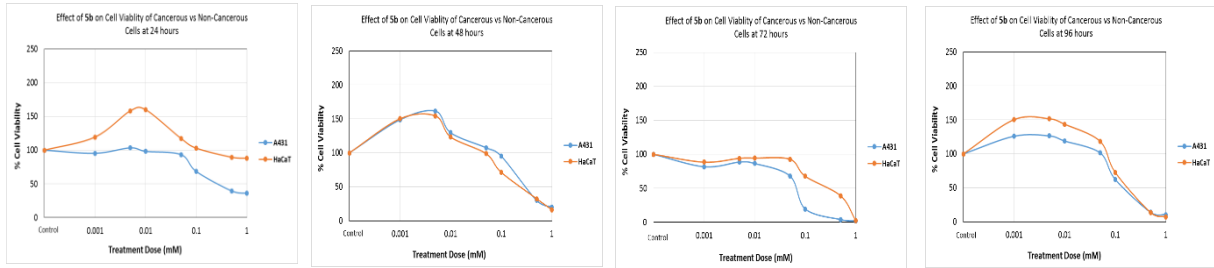

**Figure S43.** Effects of **5b** on Cell Viability of Cancerous vs Non-Cancerous Cells at 24, 48, 72, and 96 Hours.

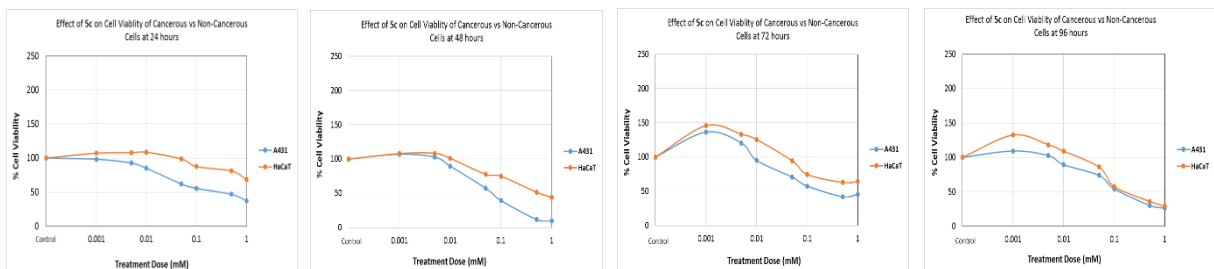

**Figure S44.** Effects of **5c** on Cell Viability of Cancerous vs Non-Cancerous Cells at 24, 48, 72, and 96 Hours.

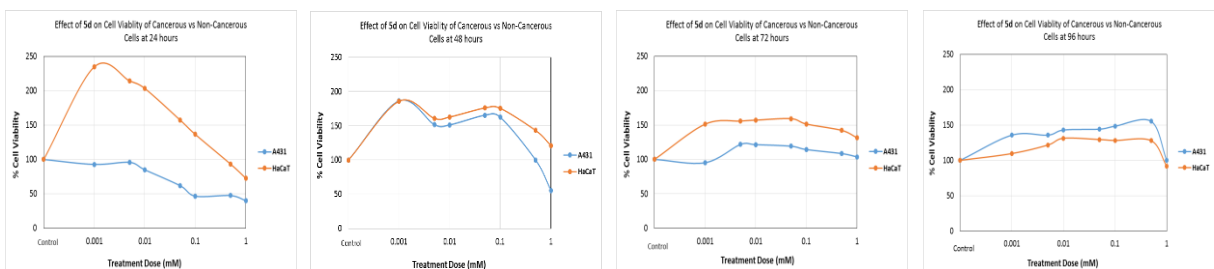

**Figure S45.** Effects of **5d** on Cell Viability of Cancerous vs Non-Cancerous Cells at 24, 48, 72, and 96 Hours.

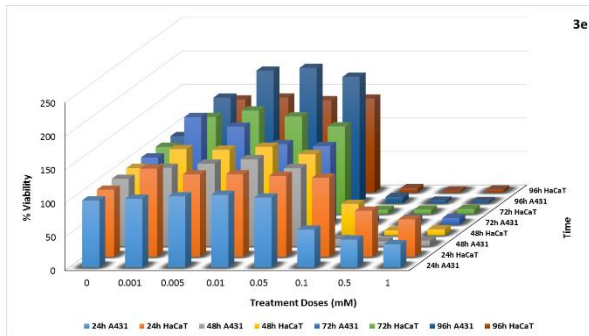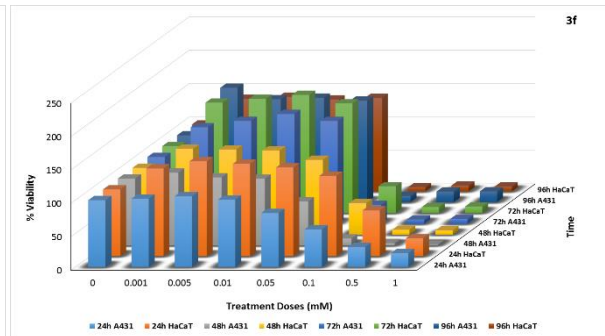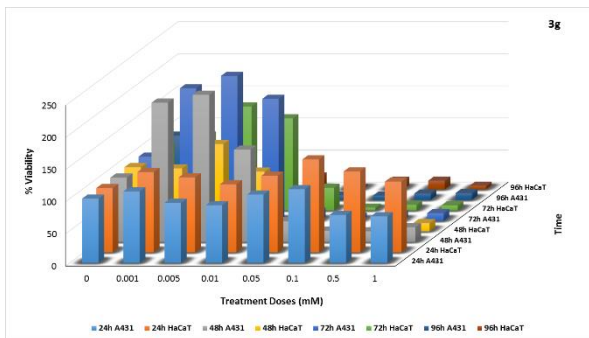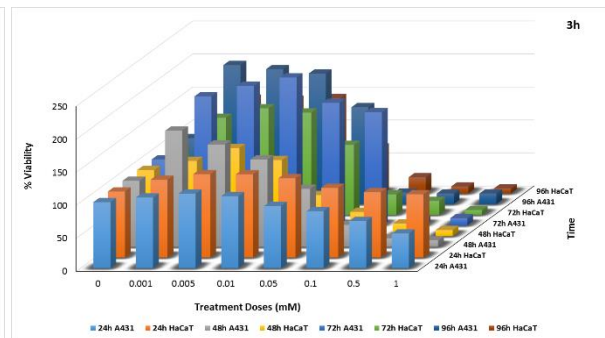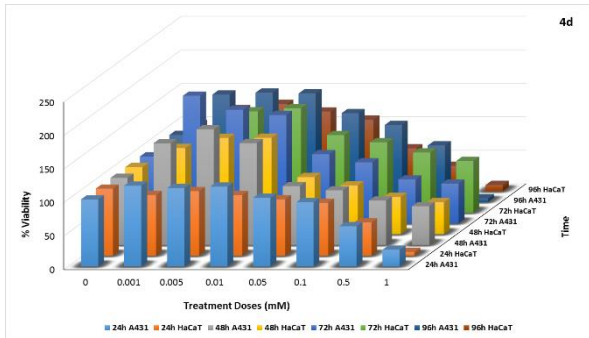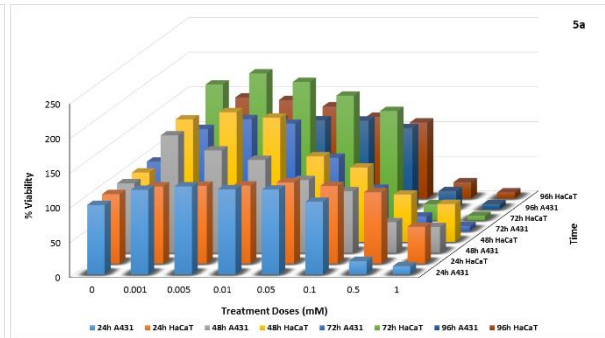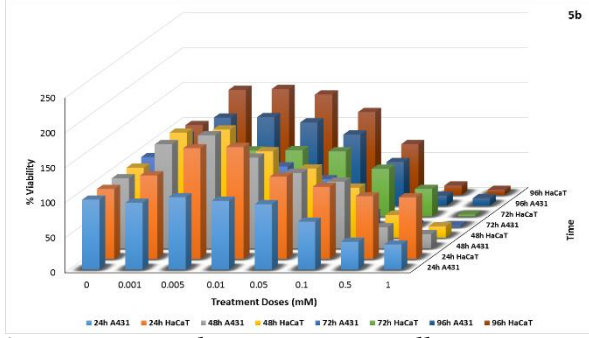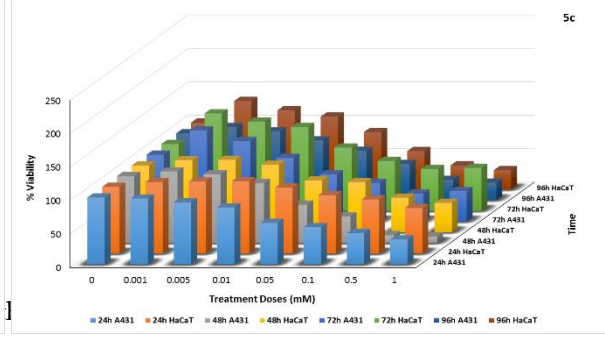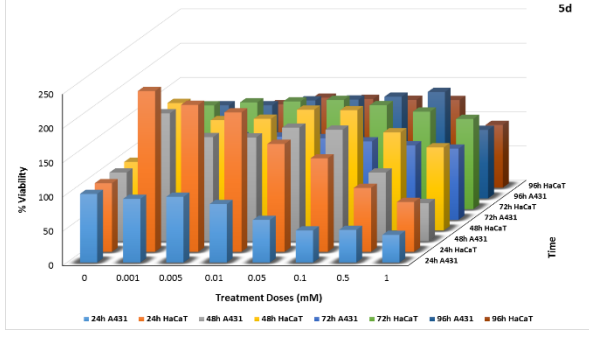

Supplement: molecules-25-00900-s001.pdf [file molecules-25-00900-s001.pdf]
